1            iterb-PPse: Identification of transcriptional  
2 terminators in bacterial by incorporating nucleotide  
3            properties into PseKNC

4            Yongxian Fan<sup>1,\*</sup>, Wanru Wang<sup>1</sup>, Qingqi Zhu<sup>1</sup>

5

6            <sup>1</sup> School of Computer Science and Information Security, Guilin University of

7            Electronic Technology, Guilin 541004, China

8

9            \* Corresponding author

10          E-mail: [yongxian.fan@gmail.com](mailto:yongxian.fan@gmail.com) (YF)

11

12

13

14

15

16

17

18

19

20

21

## 22 **Abstract**

23 Terminator is a DNA sequence that give the RNA polymerase the transcriptional  
24 termination signal. Identifying terminators correctly can optimize the genome  
25 annotation, more importantly, it has considerable application value in disease diagnosis  
26 and therapies. However, accurate prediction methods are deficient and in urgent need.  
27 Therefore, we proposed a prediction method “iterb-PPse” for terminators by  
28 incorporating 47 nucleotide properties into PseKNC- I and PseKNC- II and utilizing  
29 Extreme Gradient Boosting to predict terminators based on *Escherichia coli* and  
30 *Bacillus subtilis*. Combing with the preceding methods, we employed three new feature  
31 extraction methods K-pwm, Base-content, Nucleotidepro to formulate raw samples.  
32 The two-step method was applied to select features. When identifying terminators  
33 based on optimized features, we compared five single models as well as 16 ensemble  
34 models. As a result, the accuracy of our method on benchmark dataset achieved  
35 99.88%, higher than the existing state-of-the-art predictor iTerm-PseKNC in 100 times  
36 five-fold cross-validation test. It’s prediction accuracy for two independent datasets  
37 reached 94.24% and 99.45% respectively. For the convenience of users, a software was  
38 developed with the same name on the basis of “iterb-PPse”. The open software and  
39 source code of “iterb-PPse” are available at <https://github.com/Sarahyouzi/iterb-PPse>.

## 40 **1 Introduction**

41 DNA transcription is an important step in the inheritance of genetic information  
42 and terminators control the termination of transcription which exists in sequences that  
43 have been transcribed. When transcription, the terminator will give the RNA  
44 polymerase the transcriptional termination signal. Identifying terminators accurately  
45 can optimize the genome annotation, more importantly, it has great application value  
46 in disease diagnosis and therapies, so it is crucial to identify terminators. Whereas,  
47 using traditional biological experiments to identify terminators is extremely time  
48 consuming and labor intensive. Therefore, a more effective and convenient began to be  
49 applied in researches, that is, adopting machine learning to identify gene sequences.

50 Previous research found there are two types of terminators in prokaryotes, namely  
51 Rho-dependent and Rho-independent[1], as shown in Fig 1. Although there have been  
52 a lot of studies on the prediction of terminators, most of them only focused on one kind  
53 of them. In 2004, Wan XF, Xu D et al. proposed a prediction method for Rho-  
54 independent terminators with an accuracy of 92.25%. In 2005, Michiel J. L. de Hoon  
55 et al. studied the sequence of Rho-independent terminators in *B. subtilis*[2], and the  
56 final prediction accuracy was 94%. In 2011, Magali Naville et al. conducted a research  
57 on Rho-dependent transcriptional terminators[3]. They used two published algorithms,  
58 Erpin and RNA motif, to predict terminators. The specificity and sensitivity of the final  
59 results were 95.3% and 87.8%, respectively. In 2019, Macro Di Simone et al. utilized

60 the secondary structure of the sequence as a feature[4], the classification accuracy of  
61 the Rho-independent terminators was 67.5%. Not like the above experiments Lin Hao  
62 et al. studied the prediction of two kinds of terminators in bacterial[5],they developed  
63 a prediction tool for terminators with an accuracy of 95% in 2018.

64 To further improve the prediction accuracy, we obtained 503 terminator sequences,  
65 719 non-terminator sequences of *Escherichia coli* (*E. coli*), and 425 terminator  
66 sequences, 122 non-terminator sequence of *Bacillus subtilis* (*B. subtilis*) to construct  
67 the benchmark dataset and two independent sets. Furthermore, we proposed three new  
68 feature extraction methods (K-pwm, Base-content, Nucleotidepro) to combine them  
69 with PseKNC - I [6] and PseKNC - II [5], then applied the two-step method to select  
70 effective features. In addition, we compared five single models (Support Vector  
71 Machine (SVM), Naive Bayes, Logistic Regression (LR), Decision Tree, Multi-layer  
72 Perceptron (MLP), K-Nearest Neighbor (KNN)) as well as 16 ensemble models based  
73 on AdaBoost, Bagging, Extreme Gradient Boosting (XGBoost) and Gradient Boosting  
74 Method (GBM). Finally, we proposed a prediction method “iterb-PPse” for terminators.

75

76 **Fig 1. Transcriptional termination process.** (A) The termination do not require Rho.  
77 The transcription stops when the RNA forms the stem loop structure. (B) The  
78 termination dependent on Rho.

79

## 80 **2 Materials and Methods**

81 As shown in the Fig 2, our study is mainly divided into the following steps[7]: (1)  
82 data collection, (2) feature extraction, (3) feature combination, (4) feature selection, (5)  
83 classification, (6) result evaluation, (7) prediction method.

84

85 **Fig 2. The overall framework.** A shows main steps of our study. First step is using  
86 five extraction methods to deal datasets, then select more important features by two-  
87 step feature selection method, finally compared different models using the selected  
88 features. The “iterb-PPse” is the method we proposed to predict terminators. B  
89 illustrates the prediction process of “iterm-PPse”. It extracts three features from gene  
90 sequences at first, namely Pse5NC- I , Pse5NC- II , 47 nucleotide properties. Then sort  
91 all features using F-score and select the best feature set by IFS. Finally utilizes trained  
92 XGBoost to determine whether these sequences are terminators.

93

94

### 95 **2.1 Data Collection**

96 In our study, the initial datasets were obtained from <http://lin->  
97 [group.cn/server/iTerm-PseKNC](http://lin-group.cn/server/iTerm-PseKNC) [2], which includes 280 terminator sequences, 560  
98 non-terminator sequences of E. coli, and 425 terminator sequences of B. subtilis. To  
99 generate reliable benchmark dataset and independent dataset, we collected another 76

100 terminator sequences, 159 non-terminator sequences from *E. coli* K-12 genome in the  
101 database RegulonDB[8], and 122 non-terminator sequences of *B. subtilis* were gathered  
102 from database DBTBS[2, 9]. The non-terminator sequences of *E. coli* were intercepted  
103 from -100 bp to -20 bp upstream and 20 bp to 100 bp of positive samples not used in  
104 the benchmark dataset. The non-terminator sequences of *B. subtilis* were intercepted  
105 from -102 bp to -20 bp upstream and 20 bp to 102 bp of positive samples. At last, we  
106 divided the collected sequences into the benchmark set and the independent dataset at  
107 a ratio of 8: 2. In order to accurately evaluate the identification accuracy of our method  
108 to different bacteria, we divided the independent test set into two. Details of the  
109 benchmark dataset and independent sets are shown in Tables 1 and 2 of respectively.  
110 All sequences of *E. coli* and *B. subtilis* could be found in S1-S7 Tables of  
111 Supplementary data.

112

113

**Table 1. Benchmark dataset.**

| Species            | Category                   | Number | Length |
|--------------------|----------------------------|--------|--------|
| <i>E. coli</i>     | Rho-dependent terminator   | 18     | ~50 bp |
|                    | Rho-independent terminator | 385    | ~50 bp |
|                    | non-terminator             | 575    | 80 bp  |
| <i>B. subtilis</i> | Rho-independent terminator | 340    | ~50 bp |
|                    | non-terminator             | 98     | 82 bp  |

114

115

**Table 2. Independent dataset.**

| Species            | Category                   | Number | Length |
|--------------------|----------------------------|--------|--------|
| <i>E. coli</i>     | Rho-independent terminator | 100    | ~50 bp |
|                    | non-terminator             | 143    | 80 bp  |
| <i>B. subtilis</i> | Rho-independent terminator | 85     | ~50 bp |
|                    | non-terminator             | 24     | 82 bp  |

116

## 117 **2.2 Feature extraction**

118 How to extract effective features from DNA sequences is a particularly important  
119 step. At present, the input of most machine learning methods must be numerical values  
120 rather than character sequences[10], such as decision tree, logistic regression etc. Thus,  
121 it is essential to make use of proper feature extraction methods to represent sequences.

122

### 123 **2.2.1 K-pwm**

124 The new feature extraction method “K-pwm” mainly employed the Position  
125 Weight Matrix[11-14], where K represents  $k$ -tuple nucleotides. Considering that the  
126 length of negative samples is different from that of the positive samples in the  
127 benchmark set. we made a little modification to the calculation of the final sequence  
128 score to eliminate the negative impact of sequence length. A total of 6 feature sets were

129 obtained by using this method, namely the position weight features corresponding to  $k$   
130 =1, 2, 3, 4, 5, 6. The calculation steps are shown below.

131 
$$p_0 = \frac{1}{4^k}, \quad (1)$$

132 where  $p_0$  represents the background probability of the occurrence of  $k$ -tuple nucleotides.

133 
$$p_{xi} = \frac{n_{xi}}{N_i}, \quad (2)$$

134 where  $p_{xi}$  indicates the probability of  $k$ -tuple nucleotide  $x$  appearing at site  $i$ .

135 
$$W_{xi} = \ln \left( \frac{p_{xi}}{p_0} \right), \quad (3)$$

136 where  $W_{xi}$  is the element in the position weight matrix.

137 
$$F = \frac{1}{L} \sum_i W_{xi}, \quad (4)$$

138 where  $L$  is the length of the corresponding sequence.

139

## 140 **2.2.2 Base-content**

141 Given that the rho-independent terminators are rich in GC base pairs, we extracted  
142 a set of features and collectively referred to as Base-content[15, 16]. Specifically, we  
143 mainly obtained the content features of the single nucleotide(A, C, G, T) in each DNA  
144 sequence[17, 18]. In this paper, 5 kinds of base content features(atContent, gcContent,  
145 gcSkew, atSkew, atgcRatio)[15, 16, 19-21] were took into account.

146 
$$p_i^{A+T} = \frac{m_i^{A+T}}{m_i^{A+T+G+C}}; \quad (5)$$

147 
$$p_i^{G+C} = \frac{m_i^{G+C}}{m_i^{A+T+G+C}}; \quad (6)$$



148 
$$P_i^{\text{atgRatio}} = \frac{m_i^{\text{A+T}}}{m_i^{\text{G+C}}}; \quad (7)$$

149 
$$P_i^{\text{gcSkew}} = \frac{m_i^{\text{G-C}}}{m_i^{\text{G+C}}}; \quad (8)$$

150 
$$P_i^{\text{atSkew}} = \frac{m_i^{\text{A-T}}}{m_i^{\text{A+T}}}; \quad (9)$$

151 where  $mG_i$ ,  $mC_i$  are the contents of G and C in the  $i$ -th sequence, respectively.  $m_{\text{A+T}}$   
152  $i$ ,  $m_{\text{G+C}}$   $i$ ,  $m_{\text{A+T+G+C}}$   $i$  are the contents of “A+T”, “G+C” and “A+T+G+C”,  
153 respectively.  $m_{\text{A-T}}$   $i$  ,  $m_{\text{G-C}}$   $i$  represent the content of “A-T” and “G-C”,  
154 respectively.

155

### 156 **2.2.3 Nucleotidepro**

157 Nucleotide properties of DNA sequences play a key role in gene regulation[22].  
158 Therefore, we proposed a new feature extraction method “Nucleotidepro” involving 47  
159 properties[23] not covered previously, including 3 nucleotide chemical properties[24],  
160 32 dinucleotide physicochemical properties and 12 trinucleotide physicochemical  
161 properties.

162 To extract corresponding features, we employed a  $47 * L$  dimension matrix to  
163 represent each sequence.  $L$  is the length of the corresponding sequence. As shown in  
164 the Table 3, we used 0 and 1 to represent the chemical properties of different  
165 nucleotides. Then we iterated through each sequence and assigned the values of

166 different properties for different nucleotide to the corresponding elements in the matrix.

167 The nucleotide properties and corresponding standard-converted values[23] for the 47

168 properties can be obtained from the Tables S8 and S9 from Supplementary data.

169

170 **Table 3. Corresponding values for different chemical properties.**

| Chemical         | Category   | Nucleotides | Value |
|------------------|------------|-------------|-------|
| Ring structure   | Purine     | AG          | 0     |
|                  | Pyrimidine | CT          | 1     |
| Hydrogen bond    | Strong     | CG          | 0     |
|                  | Weak       | AT          | 1     |
| Functional group | Amino      | AC          | 0     |
|                  | Keto       | GT          | 1     |

171

#### 172 **2.2.4 PseKNC- I**

173 PseKNC-I [6] is generally understood to mean the parallel correlation PseKNC. It

174 combines K-tuple nucleotides components [25] with 6 physicochemical properties [22]

175 (rise, slide, shift, twist, roll, tilt), not only considering the global or long-range sequence

176 information, but also calculating the biochemical information of DNA sequences. The

177 PseKNC- I features can be obtained directly through the online tool Pse-in-one [26,

178 27], or run our code to process multiple sequences at the same time.

179 By changing the value of  $K$ , more features could be obtained. However, as the  
180 dimension of the feature matrix increases, it may lead to over-fitting and generate a  
181 large amount of redundant data[28]. Therefore, only three feature sets were extracted  
182 when  $K = 4, 5$  and  $6$ , respectively.

183

### 184 **2.2.5 PseKNC- II**

185 PseKNC- II , also known as the series correlation PseKNC[5]. PseKNC- II also  
186 calculated the  $K$ -tuple pseudo nucleotide properties, but unlike PseKNC-I, it considered  
187 the difference between properties. By changing the value of  $K$ . We extracted three  
188 feature sets when  $K= 4, 5, 6$  respectively.

189

## 190 **2.3 Feature combination**

191 Each feature extraction method can extract distinctive features of the DNA  
192 sequence with different emphasis. To further optimize the prediction results, we  
193 analyzed the performance of five feature extraction methods by training XGBoost to  
194 predict terminators and selected the more effective features from each method to  
195 combine. The specific combination method will be introduced in the section **Results**.

196

## 197 **2.4 Feature selection**

198 Feature selection is an important data process, which could not only reduce the  
199 computation time, but also remove redundant data, and select more effective features,  
200 finally greatly improve the prediction accuracy[28].Hence, the two-step method was  
201 adopted to select features.

202

### 203 **2.4.1 Feature analysis**

204 To present the correlation between features, the Pearson correlation coefficients  
205 were calculated to construct correlation matrix. If the two properties change in the  
206 opposite direction, it is a opposite effect. As shown in Fig 3, the features contain some  
207 redundant data, so it is necessary to utilize the two-step feature selection method[5, 17,  
208 29].

209

210 **Fig 3. Correlation of all features.** The correlation between all features obtained by  
211 calculating the Pearson correlation coefficient.

212

## 213 2.4.2 Feature Sorting

214 The first step is utilizing feature sorting methods. The main task of feature sort is  
215 to analyze the importance of each feature for prediction of terminators. The top features  
216 are more helpful in predicting terminators.

217 **F-score.** F-score[6] is a method for measuring the ability of a feature to distinguish  
218 between two classes. Given the training set  $x$ , if  $n^+$  and  $n^-$  stand for the number of  
219 positive and negative samples, respectively. The F-score of the  $i$ -th feature is inferred  
220 to be:

$$221 F_i = \frac{(\bar{x}_i^{(+)} - \bar{x}_i)^2 + (\bar{x}_i^{(-)} - \bar{x}_i)^2}{\frac{1}{n^+ - 1} \sum_{k=1}^{n^+} (\bar{x}_{k,i}^{(+)} - \bar{x}_i^{(+)})^2 + \frac{1}{n^- - 1} \sum_{k=1}^{n^-} (\bar{x}_{k,i}^{(-)} - \bar{x}_i^{(-)})^2}, \quad (10)$$

222 where  $\bar{x}_i$ ,  $\bar{x}_i^{(+)}$ ,  $\bar{x}_i^{(-)}$  represent the average of the  $i$ -th feature in all samples,  
223 positive samples, and negative samples, respectively.  $\bar{x}_{k,i}^{(+)}$  is the  $i$ -th feature of the  
224  $k$ -th positive sample,  $\bar{x}_{k,i}^{(-)}$  is the  $i$ -th feature of the  $k$ -th negative sample. The larger  
225 the F-score, the more distinctive this feature. The existing feature sorting toolkit  
226 fselect.py can be obtained from <http://www.csie.ntu.edu.tw/~cjlin/>.

227 **Binomial distribution.** As well as, binomial distribution[27, 30] were used to sort  
228 the features[31, 32]. The specific process is as follows:

$$229 q_i = m_i / M, \quad (11)$$

230 where  $q_i$  is the prior probability,  $m_i$  represents the number of  $i$ -th samples ( $i = 1, 2$   
231 indicates positive and negative respectively), and  $M$  is the number of all samples.

232 
$$P(n_{ij}) = \sum_{m=n_{ij}}^{N_j} \frac{N_j!}{m!(N_j-m)} q_i^m (1-q_i)^{N_j-m}, \quad (12)$$

233 where  $n_{ij}$  represents the times of the  $j$ -th feature appears in the  $i$ -th samples, and  $N_j$  is  
234 the times of the  $j$ -th feature appears in all samples.

235 
$$CL_{ij} = 1 - P(n_{ij}). \quad (13)$$

236 
$$CL_j = \max(CL_{i1}, CL_{i2}), \quad (14)$$

237 where  $CL_j$  is the confidence level, the higher the confidence level, the higher the  
238 credibility. Therefore, the confidence level of each feature was ranked in descending  
239 order according to the corresponding  $CL_j$ .

240

### 241 **2.4.3 Incremental feature selection**

242 The second step is Incremental Feature Selection(IFS)[33]. It uses a feature as the  
243 training set at first, then the sorted features are added to the training set one by one,  
244 finally find the number of features corresponding to highest classification accuracy.

245

## 246 **2.5 Data normalization**

247 It is necessary to process the data into the required format before conducting  
248 experiments, such as normalized. Our study first employed function “mapminmax” for  
249 data normalization, its purpose is to make data limited in a certain range, such as [0, 1]  
250 or [-1, 1], thereby eliminating singular sample data leading to negative impact.

251 In addition, it should be noted that data normalization is not applicable to all  
252 classification algorithms, and sometimes it may lead to a decrease in accuracy. Data  
253 normalization applies to optimization problems like AdaBoost, Support Vector  
254 Machine, Logistic regression, K-Nearest Neighbor but not probability models such as  
255 decision tree.

256

## 257 **2.6 Model**

### 258 **2.6.1 Single model**

259 **SVM.** The principle of SVM[34] is using a series of kernel functions to map the  
260 initial feature sets to high-dimensional space, and then finding a hyperplane in high-  
261 dimensional space to classify samples. The SVM pattern classification and regression  
262 package LIBSVM is available at <https://www.csie.ntu.edu.tw/~cjlin/libsvm/oldfiles/>.

263 **Naïve Bayes.** Naïve Bayes uses the prior probability of an object to calculate  
264 posterior probability belongs to one of the categories by using the Bayes formula. The  
265 object belongs to the class whose corresponding posterior probability is the greatest.

266 **LR.** LR usually utilizes known independent variables to fit the model  $y=w^T x+b$ .  
267 Then, predict the value of a discrete dependent variable (whether true or false). Besides  
268 its output value should be 0~1, so it is very suitable for dealing with the two-class  
269 problem.

270       **KNN.** The main principle of the K-Nearest Neighbor is to find  $k$  samples closest  
271 to the sample to be classified. Then count which category has the largest number of  
272 samples, and the current sample belongs to this category.

273       **Decision Tree.** Decision Tree is based on the tree structure which usually formed  
274 by a root node, several leaf nodes and some branches. A node represents an attribute,  
275 each branch indicates an option, and each leaf represents a classification result. The  
276 principle is to construct a tree with the maximum information gain as a criterion,  
277 combine various situations through a tree structure, and then employ it to predict new  
278 samples.

279       **MLP.** MLP with multiple neuron layers, also be known as Deep Neural Networks.  
280 Similar to a common neural network, it has an input layer, implicit layers, an output  
281 layer, and optimizes the model by information transfer between layers.

282

## 283   **2.6.2 Ensemble model**

284       **Bagging.** Bagging's main principle is to integrate multiple base models of the same  
285 kind in order to obtain better learning and generalization performance. Single model  
286 SVM, Naïve Bayes, Decision Tree[35] and LR were employed as the base classifier  
287 respectively. First, the training set is separated into multiple training subsets to train  
288 different models. Then make final decision through the voting method.



289       **AdaBoost.** AdaBoost is a typical iterative algorithm whose core idea is to train  
290 different classifiers (weak classifiers) using the same training set. It adjusts the weight  
291 based on whether the sample in each training set is correct and the accuracy of the last  
292 round. Then, the modified weights are sent to next layer for training, the classifier  
293 obtained by each training are integrated as the ultimate classifier. In our study, Decision  
294 Tree, SVM, LR and Naïve Bayes were mainly adopted as the weak classifier for  
295 iterative algorithm.

296       **GBM.** finds the maximum value of a function by exploring it along the gradient  
297 direction. The gradient operator always points to the fastest growing direction. Because  
298 of the high computational complexity, the improved algorithm only uses one sample  
299 point to update the regression coefficient at a time, which greatly improves the  
300 computational complexity of the algorithm.

301       **XGBoost.** XGBoost which utilizes the cart tree that can get the predicted score as  
302 the base classifier, optimizes different trees in turn during training, adds them to the  
303 integrated classifier, and finally get the predicted scores of all trees. The scores are  
304 added together to get the classification results.

305

### 306 2.6.3 Parameter Optimization

307 Before applying various models, we studied the parameters of each model and  
 308 selected some more important to optimize by grid search using 100 times 5-fold cv  
 309 scheme[36], as shown in Table 4.

310

311 **Table 4. Parameters and the value range of parameter adjustment.**

| Model         | Parameter                                                                          | Value                                                                                 |
|---------------|------------------------------------------------------------------------------------|---------------------------------------------------------------------------------------|
| SVM           | $c, g$                                                                             | $[2^{-5}, 2^{15}] \Delta=2, [2^{-15}, 2^{-5}] \Delta=2^{-1}$<br>$[0.1, 1] \Delta=0.1$ |
| LR            | $c, solver$                                                                        | newton-cg, lbfgs, liblinear, sag                                                      |
| MLP           | $alpha$                                                                            | 0.001, 0.01, 0.1, 0.5, 1, 1.5                                                         |
| Decision Tree | $min\_sample\_split, max\_depth$                                                   | $[2, 30] \Delta=2, [1, 10] \Delta=1$                                                  |
| Bagging       | $n\_estimators$                                                                    | $[10, 1000] \Delta=50$                                                                |
| AdaBoost      | $n\_estimators, learning\_rate$                                                    | $[10, 1000] \Delta=50, [0.1, 1] \Delta=0.1$                                           |
| GBM           | $learning\_rate, n\_estimators$<br>$max\_depth, max\_features,$<br>$random\_state$ | $[0.1, 1] \Delta=0.1, [10, 1000] \Delta=50$<br>$[1, 10] \Delta=1$                     |
| XGBoost       | $n\_estimators, learning\_rate$                                                    | $[10, 1000] \Delta=50, [0.1, 1] \Delta=0.1$                                           |

312  $\Delta$  represents the step size.

## 313 **2.7 Cross-validation test**

314 The 5-fold cross-validation (5-fold CV) can effectively avoid over-fitting and  
315 under-learning[37], and the results obtained are more convincing. First randomly divide  
316 the dataset into 5 pieces. One of them was employed as the test set and the other four  
317 were used as training sets. The above process is repeated until each of the five datasets  
318 serves as the test set[38]. Since the datasets are randomly divided, the results are  
319 accidental. The stability of the results can be improved by performing repeatedly.

320

## 321 **2.8 Independent test**

322 To test the prediction performance, we utilized the independent set to test  
323 prediction performance of terminators. The initial independent sets were obtained from  
324 <http://lin-group.cn/server/iTerm-PseKNC> [2], containing sequences of *E. coli* and *B.*  
325 *subtilis*, respectively. However, both of them do not include negative samples, which  
326 result in the test results are not convincing. Therefore, we collected another 159 non-  
327 terminator sequences of *E. coli* and 122 non-terminator sequences of *B. subtilis* from  
328 database RegulonDB and DBTBS to construct two reliable independent sets.

329

## 330 2.9 Performance measures

331 For the sake of better presentation and comparison of the experiments results, we  
 332 mainly calculated the following four evaluation parameters[39-41].

$$\begin{cases}
 \text{Sn} = 1 - \frac{N_{-}^{+}}{N^{+}} & 0 \leq \text{Sn} \leq 1 \\
 \text{Sp} = 1 - \frac{N_{+}^{-}}{N^{-}} & 0 \leq \text{Sp} \leq 1 \\
 \text{Acc} = 1 - \frac{N_{-}^{+} + N_{+}^{-}}{N^{+} + N^{-}} & 0 \leq \text{Acc} \leq 1 \\
 \text{MCC} = \frac{1 - \left( \frac{N_{-}^{+}}{N^{+}} + \frac{N_{+}^{-}}{N^{-}} \right)}{\sqrt{\left( 1 + \frac{N_{+}^{-} - N_{-}^{+}}{N^{+}} \right) \left( 1 + \frac{N_{-}^{+} - N_{+}^{-}}{N^{-}} \right)}} & -1 \leq \text{MCC} \leq 1
 \end{cases}, \quad (15)$$

333

334 where  $N^{+}$  represents the number of terminator sequences, and  $N^{-}$  is the number of non-  
 335 terminator sequences,  $N_{-}^{+}$  indicates the number of positive samples mistaken as  
 336 negative samples, and  $N_{+}^{-}$  indicates the number of negative samples mistaken as  
 337 positive samples. Sn and Sp delegate the ability of the model to accurately predict  
 338 samples. Acc reflects the prediction accuracy of models. MCC measures the  
 339 performance of model[5] on the unbalanced benchmark dataset[42, 43].

340 In addition to the above four evaluation parameters, the ROC curve was adopted to  
 341 evaluate the comprehensive performance of different method. It is a comprehensive  
 342 indicator of continuous variables of sensitivity and specificity. AUC is the area below  
 343 the ROC curve. Generally, the higher the value of AUC, the higher the classification  
 344 accuracy[17].

345

## 346 **3 Results and Discussion**

### 347 **3.1 Analysis of feature selection**

348 As shown in Fig 4, we compared the experimental results with and without feature  
349 selection, and drew the accuracy corresponding to different number of features after  
350 IFS. It is clear that the number of features has a great influence on the classification  
351 accuracy, and too many characteristics are bad, so it is necessary to select features.  
352 Furthermore, F-score is better than binomial distribution. Therefore, “F-score+IFS”  
353 was chose to conduct feature selection.

354

355 **Fig 4. Performance of feature selection.** (A)-(C) Relationship between the number of  
356 features and classification accuracy of three combined feature sets respectively. (D)  
357 Comparison of prediction results using three PseKNC- I features and different feature  
358 sorting methods. The combined feature set is described in detail in the next section.

359

### 360 **3.2 Comparison of different feature extraction methods**

361 We compared the performance of different feature extraction methods by training  
362 XGBoost to predict terminators. As shown in Fig 5, PseKNC- I , PseKNC- II , k-pwm,  
363 and nucleotidepro are all effective, but the performance of base content is not ideal.  
364 Hence, the more effective features were selected to construct combined feature sets. In

365 the end, a total of nine group features were obtained. Details of the combination method  
366 are shown in Table 5. As shown in Fig 6, Group 8 stands out in terms of Sn, Sp, MCC  
367 and Acc from other combined feature sets. Consequently, the three features Pse5NC-  
368 I , Pse5NC- II , 47 nucleotide properties were applied to formulate all samples.

369

370 **Fig 5. Prediction results using different feature extraction methods.** All results are  
371 obtained after 100 times 5-fold CV. The ones marked red represent the best of each  
372 method.

373

374 **Table 5. Combination of feature extraction methods.**

| Combination | Method    | Feature                | Number |
|-------------|-----------|------------------------|--------|
| Group1      | PseKNC    | Pse5NC- I , Pse5NC- II | 2083   |
| Group2      | K-pwm     | 1-pwm, 6-pwm           | 2      |
| Group3      | PseKNC- I | Pse5NC- I              | 1031   |
|             | K-pwm     | 1-pwm, 6-pwm           |        |
| Group4      | PseKNC    | Pse5NC- II             | 1056   |
|             | K-pwm     | 1-pwm, 6-pwm           |        |
| Group5      | PseKNC    | Pse5NC- I , Pse5NC- II | 2085   |
|             | K-pwm     | 1-pwm, 6-pwm           |        |
| Group6      | PseKNC    | Pse5NC- I , Pse5NC- II | 2088   |

|        |               |                                             |      |
|--------|---------------|---------------------------------------------|------|
|        | K-pwm         | 1-pwm, 6-pwm                                |      |
|        | Base-content  | 3 base content features                     |      |
|        | K-pwm         | 1-pwm, 6-pwm                                |      |
| Group7 |               | 3 nucleotide chemical properties            | 49   |
|        | Nucleotidepro | 32 dinucleotide physicochemical properties  |      |
|        |               | 12 trinucleotide physicochemical properties |      |
|        | PseKNC        | Pse5NC- I , Pse5NC- II                      |      |
| Group8 |               | 3 nucleotide chemical properties            | 2600 |
|        | Nucleotidepro | 32 dinucleotide physicochemical properties  |      |
|        |               | 12 trinucleotide physicochemical properties |      |
|        | PseKNC        | Pse5NC- I , Pse5NC- II                      |      |
|        | K-pwm         | 1-pwm, 6-pwm                                |      |
| Group9 |               | 3 nucleotide chemical properties            | 2132 |
|        | Nucleotidepro | 32 dinucleotide physicochemical properties  |      |
|        |               | 12 trinucleotide physicochemical properties |      |

---

375 The “Number” refers to the number of features after feature selection.

376

377 **Fig 6. Classification results using different combined features.** These results are

378 obtained using XGBoost after 100 times 5-fold CV.

### 379 3.3 Comparison of different models

380 To compare different methods, the above experimental process was repeated using 16  
381 different models. What can be clearly seen in Table 6 is that the classification  
382 performance of some ensemble models is better than that of a single model. For  
383 example, the accuracy of AdaBoost (SVM) and Bagging (SVM) are significantly higher  
384 than SVM. Decision tree, AdaBoost (Decision Tree) and XGBoost perform well, but  
385 XGBoost achieved the highest prediction accuracy in all models. Hence, it is reasonable  
386 and wise to choose XGBoost as the classifier.

387

388 **Table 6. Display of all model classification results.**

| Model                    | Sn            | Sp            | MCC           | Acc           |
|--------------------------|---------------|---------------|---------------|---------------|
| SVM                      | 0.9754±0.0003 | 1             | 0.9816±0.0002 | 0.9918±0.0001 |
| Decision tree            | 0.9939±0.0012 | 0.9979±0.0002 | 0.9984±0.0002 | 0.9979±0.0398 |
| LR                       | 0.9904±0.0018 | 1             | 0.9975±0.0004 | 0.9967±0.0006 |
| Naïve bayes              | 0.9933±0.0017 | 0.9935±0.0052 | 0.9984±0.0003 | 0.9978±0.0005 |
| MLP                      | 0.9911±0.0013 | 1             | 0.9977±0.0003 | 0.9970±0.0004 |
| KNN                      | 0.9921±0.0016 | 0.9994±0.0003 | 0.9966±0.0009 | 0.9970±0.0005 |
| AdaBoost (LR)            | 0.9561±0.0028 | 1             | 0.9893±0.0008 | 0.9854±0.0010 |
| AdaBoost (Naïve Bayes)   | 0.9917±0.0012 | 1             | 0.9979±0.0002 | 0.9972±0.0003 |
| AdaBoost (Decision Tree) | 0.9956±0.0013 | 0.9987±0.0005 | 0.9989±0.0003 | 0.9985±0.0004 |



|                         |                      |               |                      |                      |
|-------------------------|----------------------|---------------|----------------------|----------------------|
| AdaBoost (SVM)          | 0.9933±0.0015        | 0.9980±0.0004 | 0.9984±0.0003        | 0.9978±0.0004        |
| Bagging (Decision Tree) | 0.9910±0.0010        | 1             | 0.9976±0.0002        | 0.9969±0.0003        |
| Bagging (SVM)           | 0.9840±0.0019        | 1             | 0.9959±0.0004        | 0.9946±0.0006        |
| Bagging (LR)            | 0.9885±0.0010        | 1             | 0.9971±0.0002        | 0.9961±0.0003        |
| Bagging (Naïve Bayes)   | 0.9931±0.0019        | 0.9903±0.0001 | 0.9983±0.0005        | 0.9977±0.0006        |
| GBM                     | 0.9921±0.0015        | 1             | 0.9980±0.0003        | 0.9973±0.0005        |
| <b>XGBoost</b>          | <b>0.9964±0.0023</b> | <b>1</b>      | <b>0.9991±0.0005</b> | <b>0.9988±0.0007</b> |

389 These results are obtained after 100 times 5-fold CV with standard error[44].

390

### 391 **3.4 Comparison with existing state-of-the-art methods**

392 To verify the advantage of our method “ iterb-PPse”, we made a comprehensive  
 393 comparison with “ iTerm-PseKNC”[5], the current best tool for classifying two kinds  
 394 of terminators, on the benchmark dataset and two independent sets we constructed using  
 395 four evaluation parameters and ROC curves, as shown in Table 7 and Fig 7. The  
 396 benchmark set we utilized is exactly the same with “iTerm-PseKNC”, so the  
 397 comparison between the two methods is fair and objective.

398

399 **Table 7. Comparison of “iTerm-PseKNC” and “iterb-PPse”.**

| Dataset | Method | Sn | Sp | MCC | Acc |
|---------|--------|----|----|-----|-----|
|---------|--------|----|----|-----|-----|

---

|                    |              |               |          |               |               |
|--------------------|--------------|---------------|----------|---------------|---------------|
|                    | iterb-PPse   | <b>0.9964</b> | <b>1</b> | <b>0.9991</b> | <b>0.9988</b> |
| Benchmark dataset  | iTerm-PseKNC | 0.8545        | 0.9993   | 0.8846        | 0.9480        |
|                    | iterb-PPse   | <b>0.9013</b> | <b>1</b> | <b>0.8898</b> | <b>0.9424</b> |
| <i>E. coli</i>     | iTerm-PseKNC | 0.8879        | 0.9371   | 0.8166        | 0.9084        |
|                    | iterb-PPse   | <b>0.9929</b> | <b>1</b> | <b>0.9844</b> | <b>0.9945</b> |
| <i>B. subtilis</i> | iTerm-PseKNC | 0.96          | 0.9836   | 0.9066        | 0.9653        |

---

400 The prediction results were obtained after 100 times 5-fold CV.

401

402 **Fig 7. Comparison of “iTerm-PseKNC” and “iterb-PPse”.** (A)-(C) ROC curves of

403 two methods’ performance on the benchmark dataset and independent sets. (D)

404 Prediction accuracy of two methods on different datasets.

405

406 As shown in Table 7 and Fig 7, the “iterb-PPse” is superior to the “iTerm-PseKNC”

407 across the three datasets in Sn, Sp, MCC, Acc and AUC. Besides, the ROC curves in

408 also show that the overall performance of our method is better. To be more precise, we

409 improved the prediction accuracy (Acc) by 5.08%, 3.4%, 2.92% for the benchmark

410 dataset and two independent datasets respectively.

411

412 **3.5 Availability of software “iterb-PPse”**

413 In addition to providing all codes of the prediction method, we developed a prediction  
414 software which could directly predict whether a DNA sequence is a terminator by  
415 simply installing it according to our software manual. The interface of the software is  
416 shown in the Figure 8.

417

418 **Figure 8. Main form of prediction tool.** Just enter the sequence into the text box to  
419 get the prediction result.

420

## 421 **4 Conclusions**

422 In this work, we made miscellaneous comparisons of different feature extraction  
423 methods and models in many aspects. Eventually we proposed an accurate  
424 classification method “iterb-PPse” with 99.64%, 100%, 99.91% 99.88% in Sn, Sp,  
425 MCC, Acc respectively which is superior to the state-of-art prediction method and came  
426 to the following conclusions: (1) PseNC- I , PseNC- II , nucleotidepro are appropriate  
427 for formulating all samples. It proofs that nucleotide properties and the nucleotide  
428 components play a significant role in terminator classification and using the single GC  
429 content feature can not achieve the ideal classification effect. When using K-pwm  
430 feature extraction methods, we found that position-weight features of oligonucleotides  
431 and hexanucleotides are effective for predicting terminators (2) XGBoost works best  
432 on predicting terminators among all models based on the features we extracted. All the

433 code and data used in our experiment are open source and are available at  
434 <https://github.com/Sarahyouzi/myexperiment>, hopefully could provide some assistance  
435 for related researches.

436

## 437 **References**

- 438 1. M HT. Control of transcription termination in prokaryotes. *Annual review of genetics*.  
439 1996;30:35-57.
- 440 2. De Hoon MJL, Makita Y, Nakai K, Miyano S. Prediction of Transcriptional  
441 Terminators in *Bacillus subtilis* and Related Species. *PLoS Computational Biology*.  
442 2005;1(3):e25.
- 443 3. Naville M, Ghullot-Gaudeffroy A, Marchais A, Gautheret D. ARNold: A web tool for  
444 the prediction of Rho-independent transcription terminators. *RNA Biology*.  
445 2011;8(1):11-13.
- 446 4. Di Salvo M, Puccio S, Peano C, Lacour S, Alifano P. RhoTermPredict: an algorithm  
447 for predicting Rho-dependent transcription terminators based on *Escherichia coli*,  
448 *Bacillus subtilis* and *Salmonella enterica* databases. *BMC Bioinformatics*.  
449 2019;20(1):117.
- 450 5. Feng CQ, Zhang ZY, Zhu XJ, Lin Y, Chen W, Tang H et al. iTerm-PseKNC: a  
451 sequence-based tool for predicting bacterial transcriptional terminators.  
452 *Bioinformatics*. 2019;35(9):1469-1477.

- 453 6. Lin H, Deng EZ, Ding H, Chen W, Chou KC. iPro54-PseKNC: a sequence-based  
454 predictor for identifying sigma-54 promoters in prokaryote with pseudo k-tuple  
455 nucleotide composition. *Nucleic Acids Res.* 2014;42(21):12961-12972.
- 456 7. Chou K-C. Some remarks on protein attribute prediction and pseudo amino acid  
457 composition. *Journal of Theoretical Biology.* 2011;273(1):236-247.
- 458 8. Alberto S-Z, Heladia S, Socorro G-C, Mishael S-P, Laura G-R, Daniela L-T et al.  
459 RegulonDB v 10.5: tackling challenges to unify classic and high throughput  
460 knowledge of gene regulation in *E. coli* K-12. *Nucleic Acids Research.*  
461 2019;47(D1):D212-D220.
- 462 9. T I, K Y, G T, Y F, K N. DBTBS: a database of *Bacillus subtilis* promoters and  
463 transcription factors. *Nucleic Acids Research.* 2000;29(1):278-280.
- 464 10. Chou K-C. Impacts of Bioinformatics to Medicinal Chemistry. *Medicinal Chemistry.*  
465 2015;11(3):218-234.
- 466 11. Xia X. Position weight matrix, gibbs sampler, and the associated significance tests  
467 in motif characterization and prediction. *Scientifica (Cairo).* 2012;2012:917540.
- 468 12. Wu Q, Wang J, Yan H. An Improved Position Weight Matrix Method Based on an  
469 Entropy Measure for the Recognition of Prokaryotic Promoters. *International*  
470 *Journal of Data Mining and Bioinformatics.* 2009;5(1):22-37.
- 471 13. Sinha S (2006) On counting position weight matrix matches in a sequence, with  
472 application to discriminative motif finding. *Bioinformatics* 22 (14):e454-e463.

- 473 14. Li Q-Z, Lin H. The recognition and prediction of  $\sigma$ 70 promoters in *Escherichia coli*  
474 K-12. *Journal of Theoretical Biology*. 2006;242(1):135-141.
- 475 15. Yuval B, P ST. Summarizing and correcting the GC content bias in high-throughput  
476 sequencing. *Nucleic Acids Research*. 2012;40(10).
- 477 16. Sahyoun AH, Bernt M, Stadler PF, Tout K. GC skew and mitochondrial origins of  
478 replication. *Mitochondrion*. 2014;17(2014):56-66.
- 479 17. Yang H, Qiu WR, Liu G, Guo FB, Chen W, Chou KC et al. iRSpot-Pse6NC:  
480 Identifying recombination spots in *Saccharomyces cerevisiae* by incorporating  
481 hexamer composition into general PseKNC. *Int J Biol Sci*. 2018;14(8):883-891.
- 482 18. Farnham PJ, Platt T. Rho-independent termination: dyad symmetry in DNA causes  
483 RNA polymerase to pause during transcription in vitro. *Nucleic Acids Research*.  
484 1981;9(3):563-577.
- 485 19. A G. Analyzing genomes with cumulative skew diagrams. *Nucleic Acids Research*.  
486 1998;26(10):2286-2290.
- 487 20. Charneski CA, Honti F, Bryant JM, Hurst LD, Feil EJ. A typical AT Skew in Firmicute  
488 Genomes Results from Selection and Not from Mutation. *PLoS Genetics*.  
489 2011;7(9):e1002283.
- 490 21. Xiaoyong P, Kai X, Christian A, Poul H, K FK, Juhl JL et al. WebCircRNA:  
491 Classifying the Circular RNA Potential of Coding and Noncoding RNA. *Genes*.  
492 2018;9(11).

- 493 22. Fukue Y. A highly distinctive mechanical property found in the majority of human  
494 promoters and its transcriptional relevance. *Nucleic Acids Res.* 2005;33(12):3821-  
495 3827.
- 496 23. Chen W, Lei T-Y, Jin D-C, Lin H, Chou K-C. PseKNC: A flexible web server for  
497 generating pseudo K-tuple nucleotide composition. *Analytical Biochemistry.*  
498 2014;456:53-60.
- 499 24. Bari AT, Reaz MR, Choi H-J, Jeong B-S. DNA Encoding for Splice Site Prediction  
500 in Large DNA Sequence. *Database Systems for Advanced Applications.*  
501 Springer-Verlag New York, Inc, 2013, 46-58.
- 502 25. Ghandi M, Mohammad-Noori M, Beer MA. Robust k -mer frequency estimation  
503 using gapped k -mers. *Journal of Mathematical Biology.* 2014;69(2):469-500.
- 504 26. Liu B, Liu F, Wang X, Chen J, Fang L, Chou K-C. Pse-in-One: a web server for  
505 generating various modes of pseudo components of DNA, RNA, and protein  
506 sequences. *Nucleic Acids Research.* 2015;43(W1):W65-W71.
- 507 27. Liu B, Wu H, Chou K-C. Pse-in-One 2.0: An Improved Package of Web Servers for  
508 Generating Various Modes of Pseudo Components of DNA, RNA, and Protein  
509 Sequences. *Natural Science.* 2017;09(04):67-91.
- 510 28. Chou K-C. A Key Driving Force in Determination of Protein Structural Classes.  
511 *Biochemical and Biophysical Research Communications.* 1999;264(1):216-224.
- 512 29. Jiangning S, Fuyi L, André L, T M-LT, Tatsuya A, Gholamreza H et al.  
513 PROSPERous: high-throughput prediction of substrate cleavage sites for 90

- 514 proteases with improved accuracy. *Bioinformatics* (Oxford, England).  
515 2018;34(4):684-687.
- 516 30. Chen W, Lin H, Chou K-C. Pseudo nucleotide composition or PseKNC: an effective  
517 formulation for analyzing genomic sequences. *Molecular Biosystems*.  
518 2015;11(10):2620-2634.
- 519 31. Su ZD, Huang Y, Zhang ZY, Zhao YW, Wang D, Chen W et al. iLoc-IncRNA: predict  
520 the subcellular location of lncRNAs by incorporating octamer composition into  
521 general PseKNC. *Bioinformatics*. 2018;34(24):4196-4204.
- 522 32. Hong-Yan L, Xin-Xin C, Wei C, Hua T, Hao L. Sequence-based predictive modeling  
523 to identify cancerlectins. *Oncotarget*. 2017;8(17):28169-28175.
- 524 33. Li F, Li C, Wang M, Webb GI, Zhang Y, Whisstock JC et al. GlycoMine: a machine  
525 learning-based approach for predicting N-, C- and O-linked glycosylation in the  
526 human proteome. *Bioinformatics*. 2015;31(9):1411-1419.
- 527 34. Feng P-M, Chen W, Lin H, Chou K-C. iHSP-PseRAAAC: Identifying the heat shock  
528 protein families using pseudo reduced amino acid alphabet composition. *Analytical*  
529 *Biochemistry*. 2013;442(1):118-125.
- 530 35. Basu S, Söderquist F, Wallner B. Proteus: a random forest classifier to predict  
531 disorder-to-order transitioning binding regions in intrinsically disordered proteins.  
532 *Journal of Computer-Aided Molecular Design*. 2017;31(5):453-466.



- 533 36. Xiaoyong P, Juhl JL, Jan G. Inferring disease-associated long non-coding RNAs  
534 using genome-wide tissue expression profiles. *Bioinformatics* (Oxford, England).  
535 2018;35(9):1494-1502.
- 536 37. A cross-validation scheme for machine learning algorithms in shotgun proteomics.  
537 *BMC Bioinformatics*. 2012;13 Suppl 16:S3.
- 538 38. Panwar B, Raghava GP. Prediction of uridine modifications in tRNA sequences.  
539 *BMC Bioinformatics*. 2014;15(1):326.
- 540 39. Peng-Mian F, Hui D, Wei C, Hao L. Naïve bayes classifier with feature selection to  
541 identify phage virion proteins. *Computational and mathematical methods in*  
542 *medicine*. 2013;2013:530696.
- 543 40. Peng-Mian F, Hao L, Wei C. Identification of antioxidants from sequence  
544 information using naïve Bayes. *Computational and mathematical methods in*  
545 *medicine*. 2013;2013:567529.
- 546 41. Fuyi L, Chen L, T M-LT, André L, Tatsuya A, W PA et al. Quokka: a comprehensive  
547 tool for rapid and accurate prediction of kinase family-specific phosphorylation sites  
548 in the human proteome. *Bioinformatics* (Oxford, England). 2018;34(24):4223-4231.
- 549 42. Jiangning S, Yanan W, Fuyi L, Tatsuya A, D RN, I WG et al. iProt-Sub: a  
550 comprehensive package for accurately mapping and predicting protease-specific  
551 substrates and cleavage sites. *Briefings in bioinformatics*. 2019;20(2):638-658.

- 552 43. Liu B, Yang F, Huang D-S, Chou K-C. iPromoter-2L: a two-layer predictor for  
553 identifying promoters and their types by multi-window-based PseKNC.  
554 Bioinformatics. 2018;34(1):33-40.
- 555 44. W BG. Standard deviation, standard error. Which 'standard' should we use.  
556 American journal of diseases of children. 1982;136(10).

557

## 558 **Supporting information**

559

560 **S1 Table. Dataset with 280 terminator sequences of *E. coli*.**

561 (CSV)

562 **S2 Table. Dataset with 560 non-terminator sequences of *E. coli*.**

563 (CSV)

564 **S3 Table. Dataset with 425 terminator sequences of *B. subtilis*.**

565 (CSV)

566 **S4 Table. Dataset with 147 terminator sequences of *E. coli*.**

567 (CSV)

568 **S5 Table. Dataset with 76 terminator sequences of *E. coli*.**

569 (CSV)

570 **S6 Table. Dataset with 159 non-terminator sequences of *E. coli*.**

571 (CSV)

572 **S7 Table. Dataset with 122 non-terminator sequences of *B. subtilis*.**

573 (CSV)

574 **S8 Table. Dinucleotide physicochemical properties.** This table contains 32  
575 dinucleotide physicochemical properties we used and the corresponding standard  
576 values.

577 (CSV)

578 **S9 Table. Trinucleotide physicochemical properties.** This table contains 12  
579 trinucleotide physicochemical properties we used and the corresponding standard  
580 values.

581 (CSV)

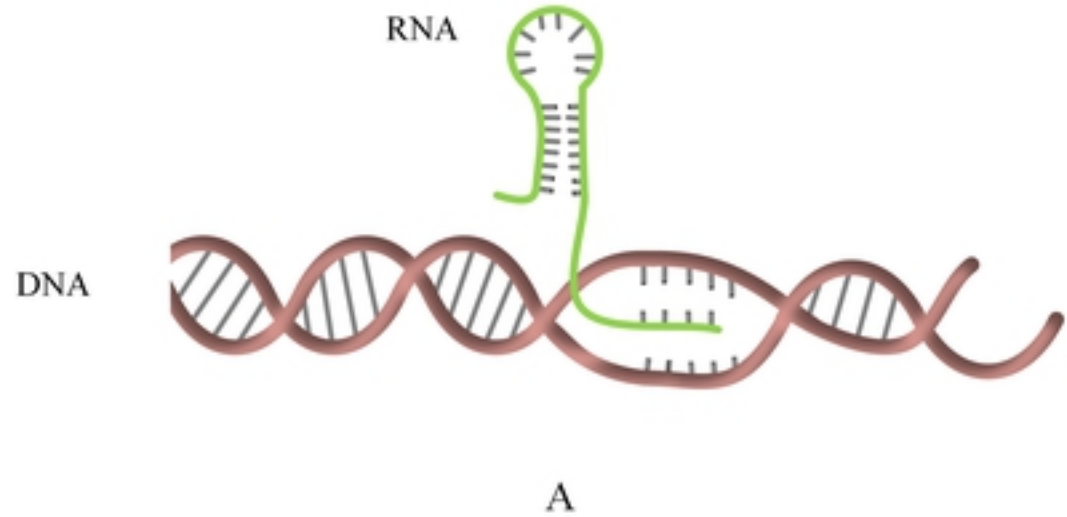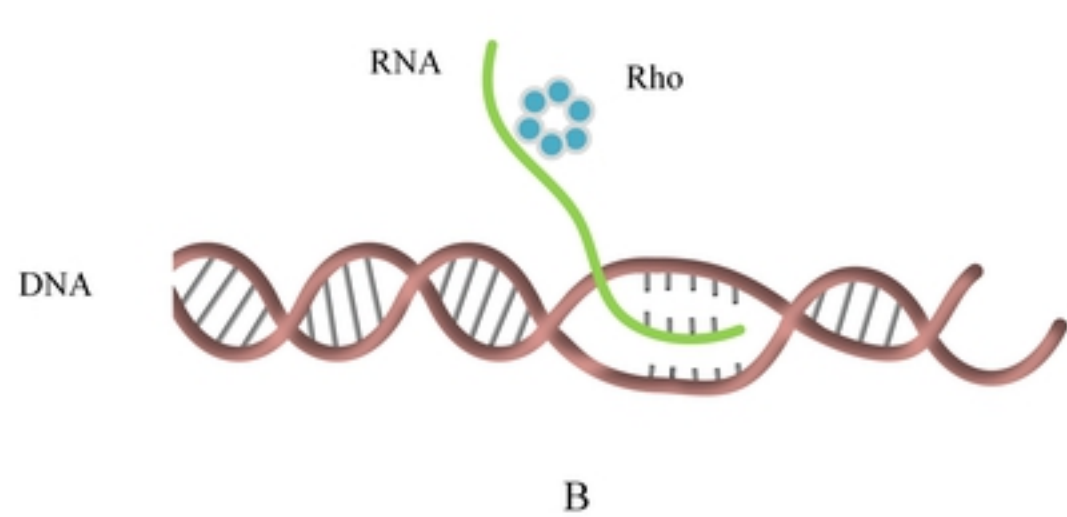

Figure

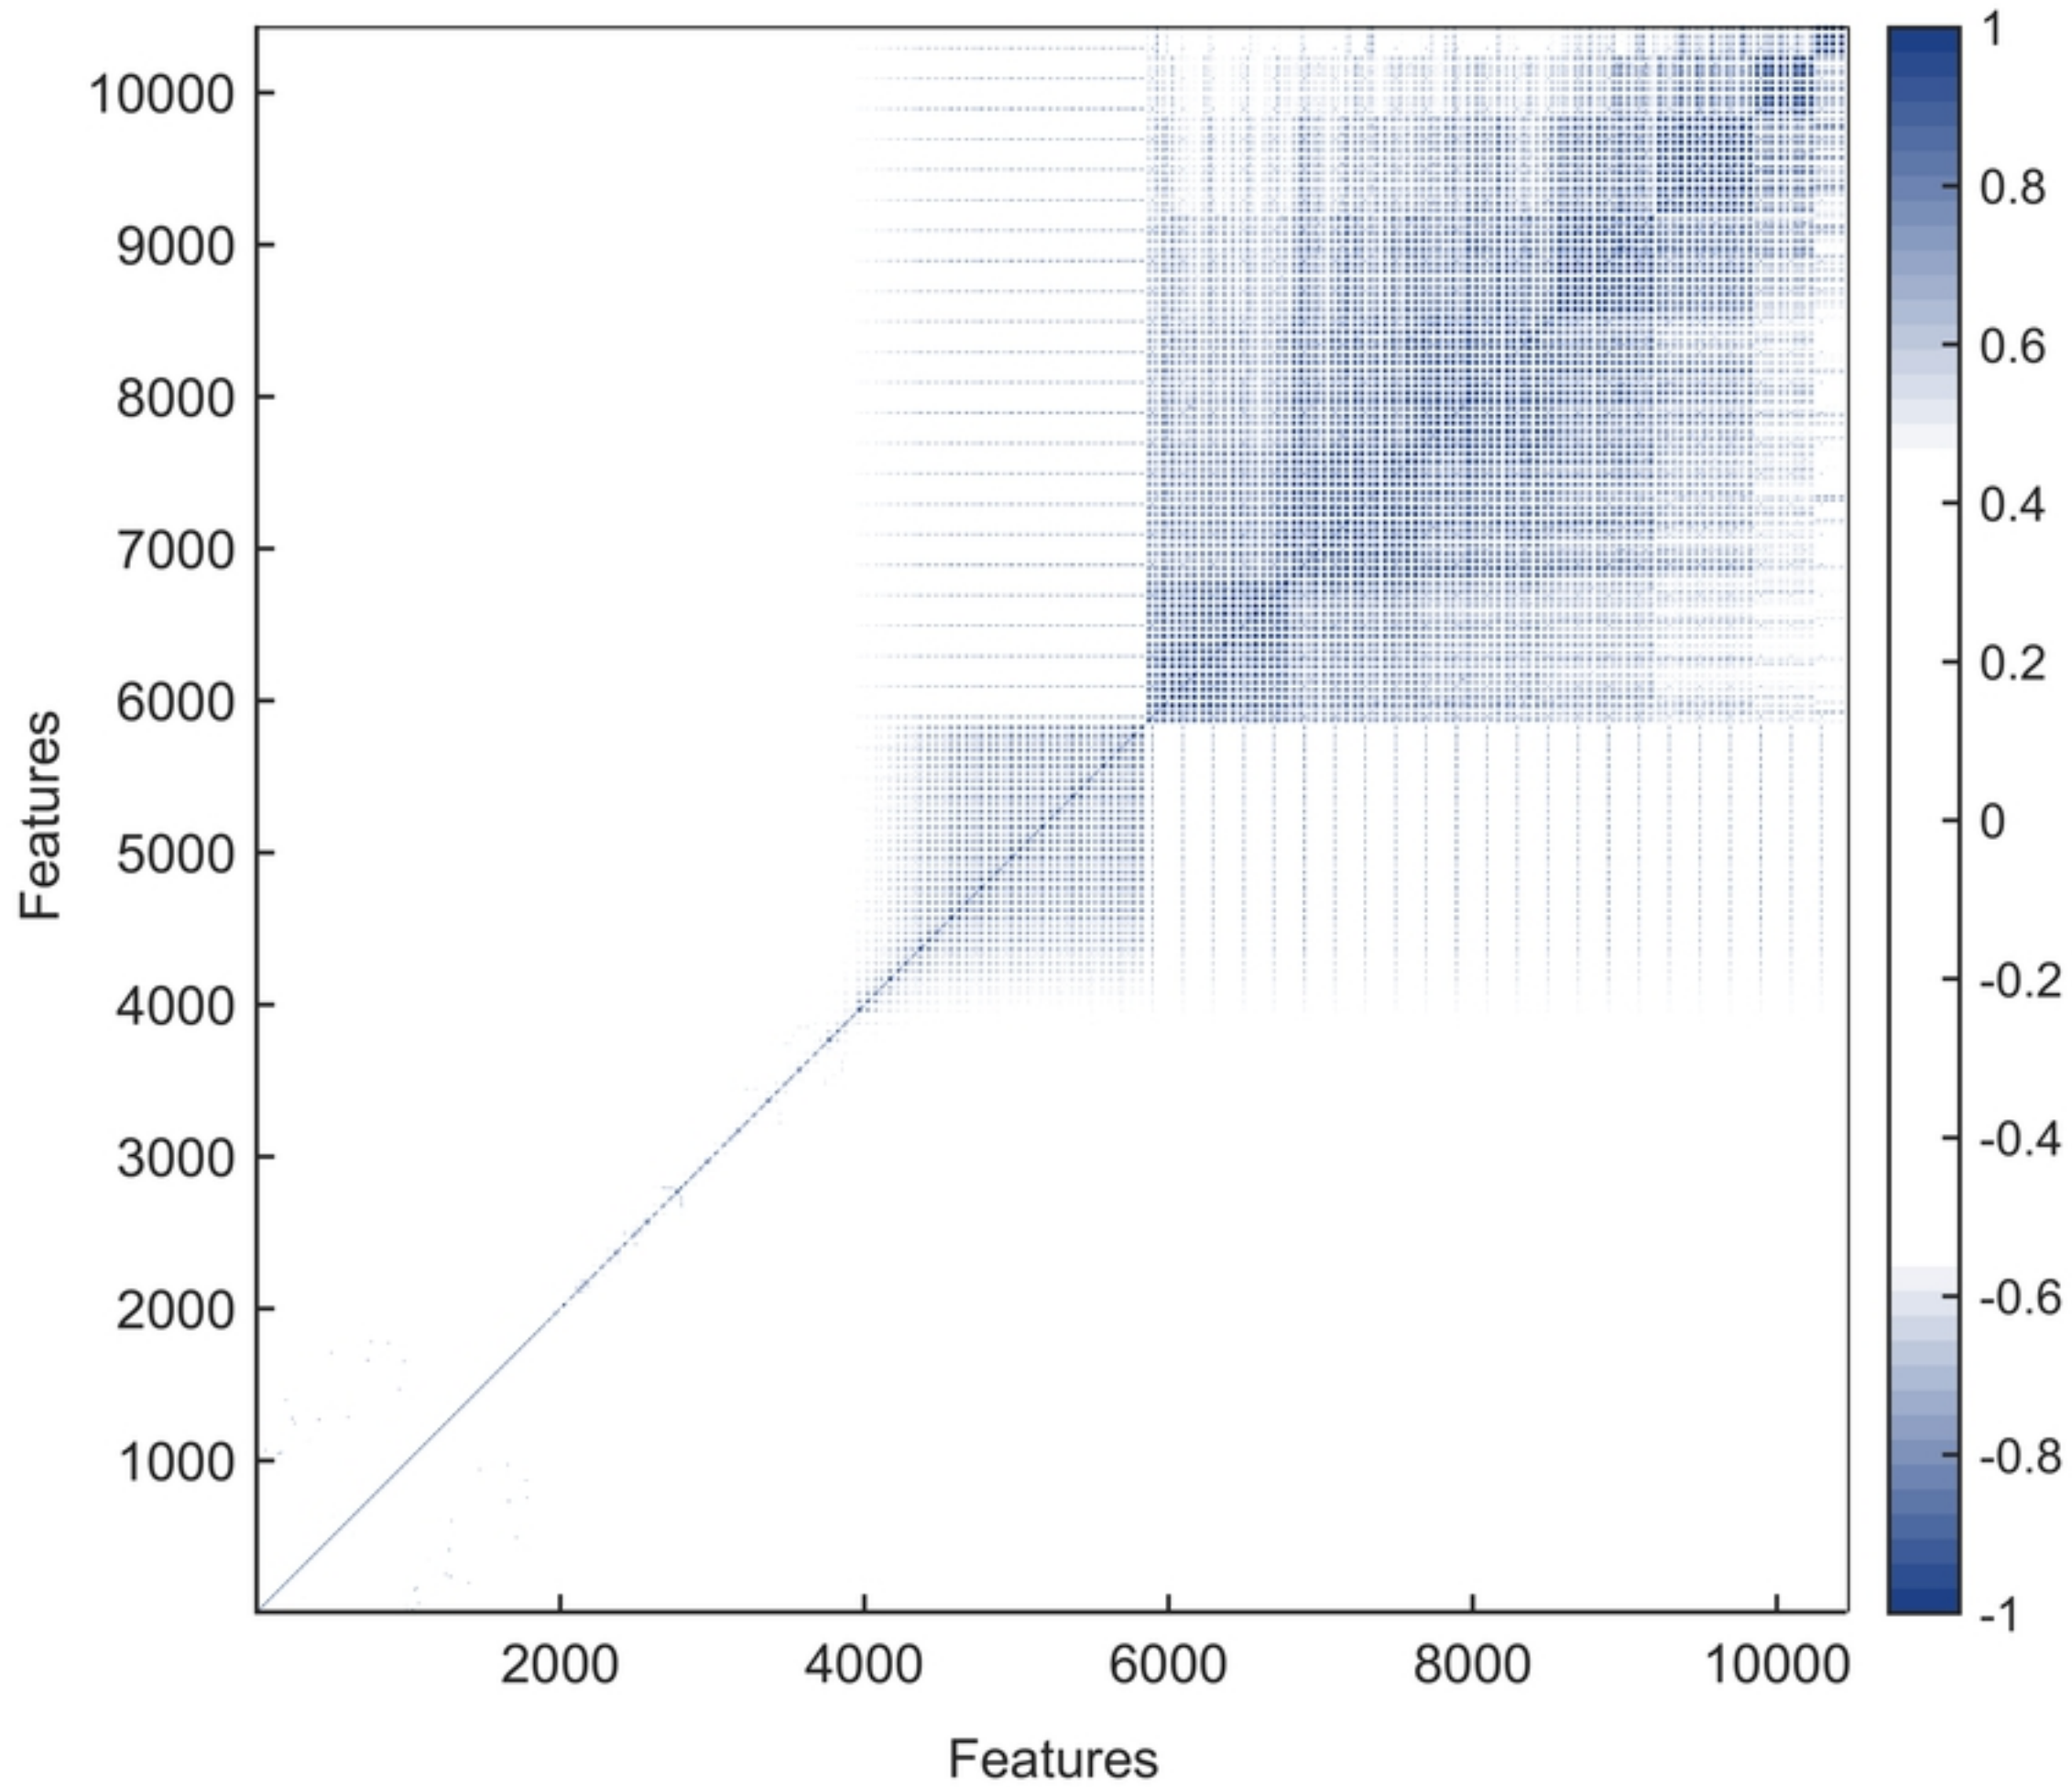

Figure

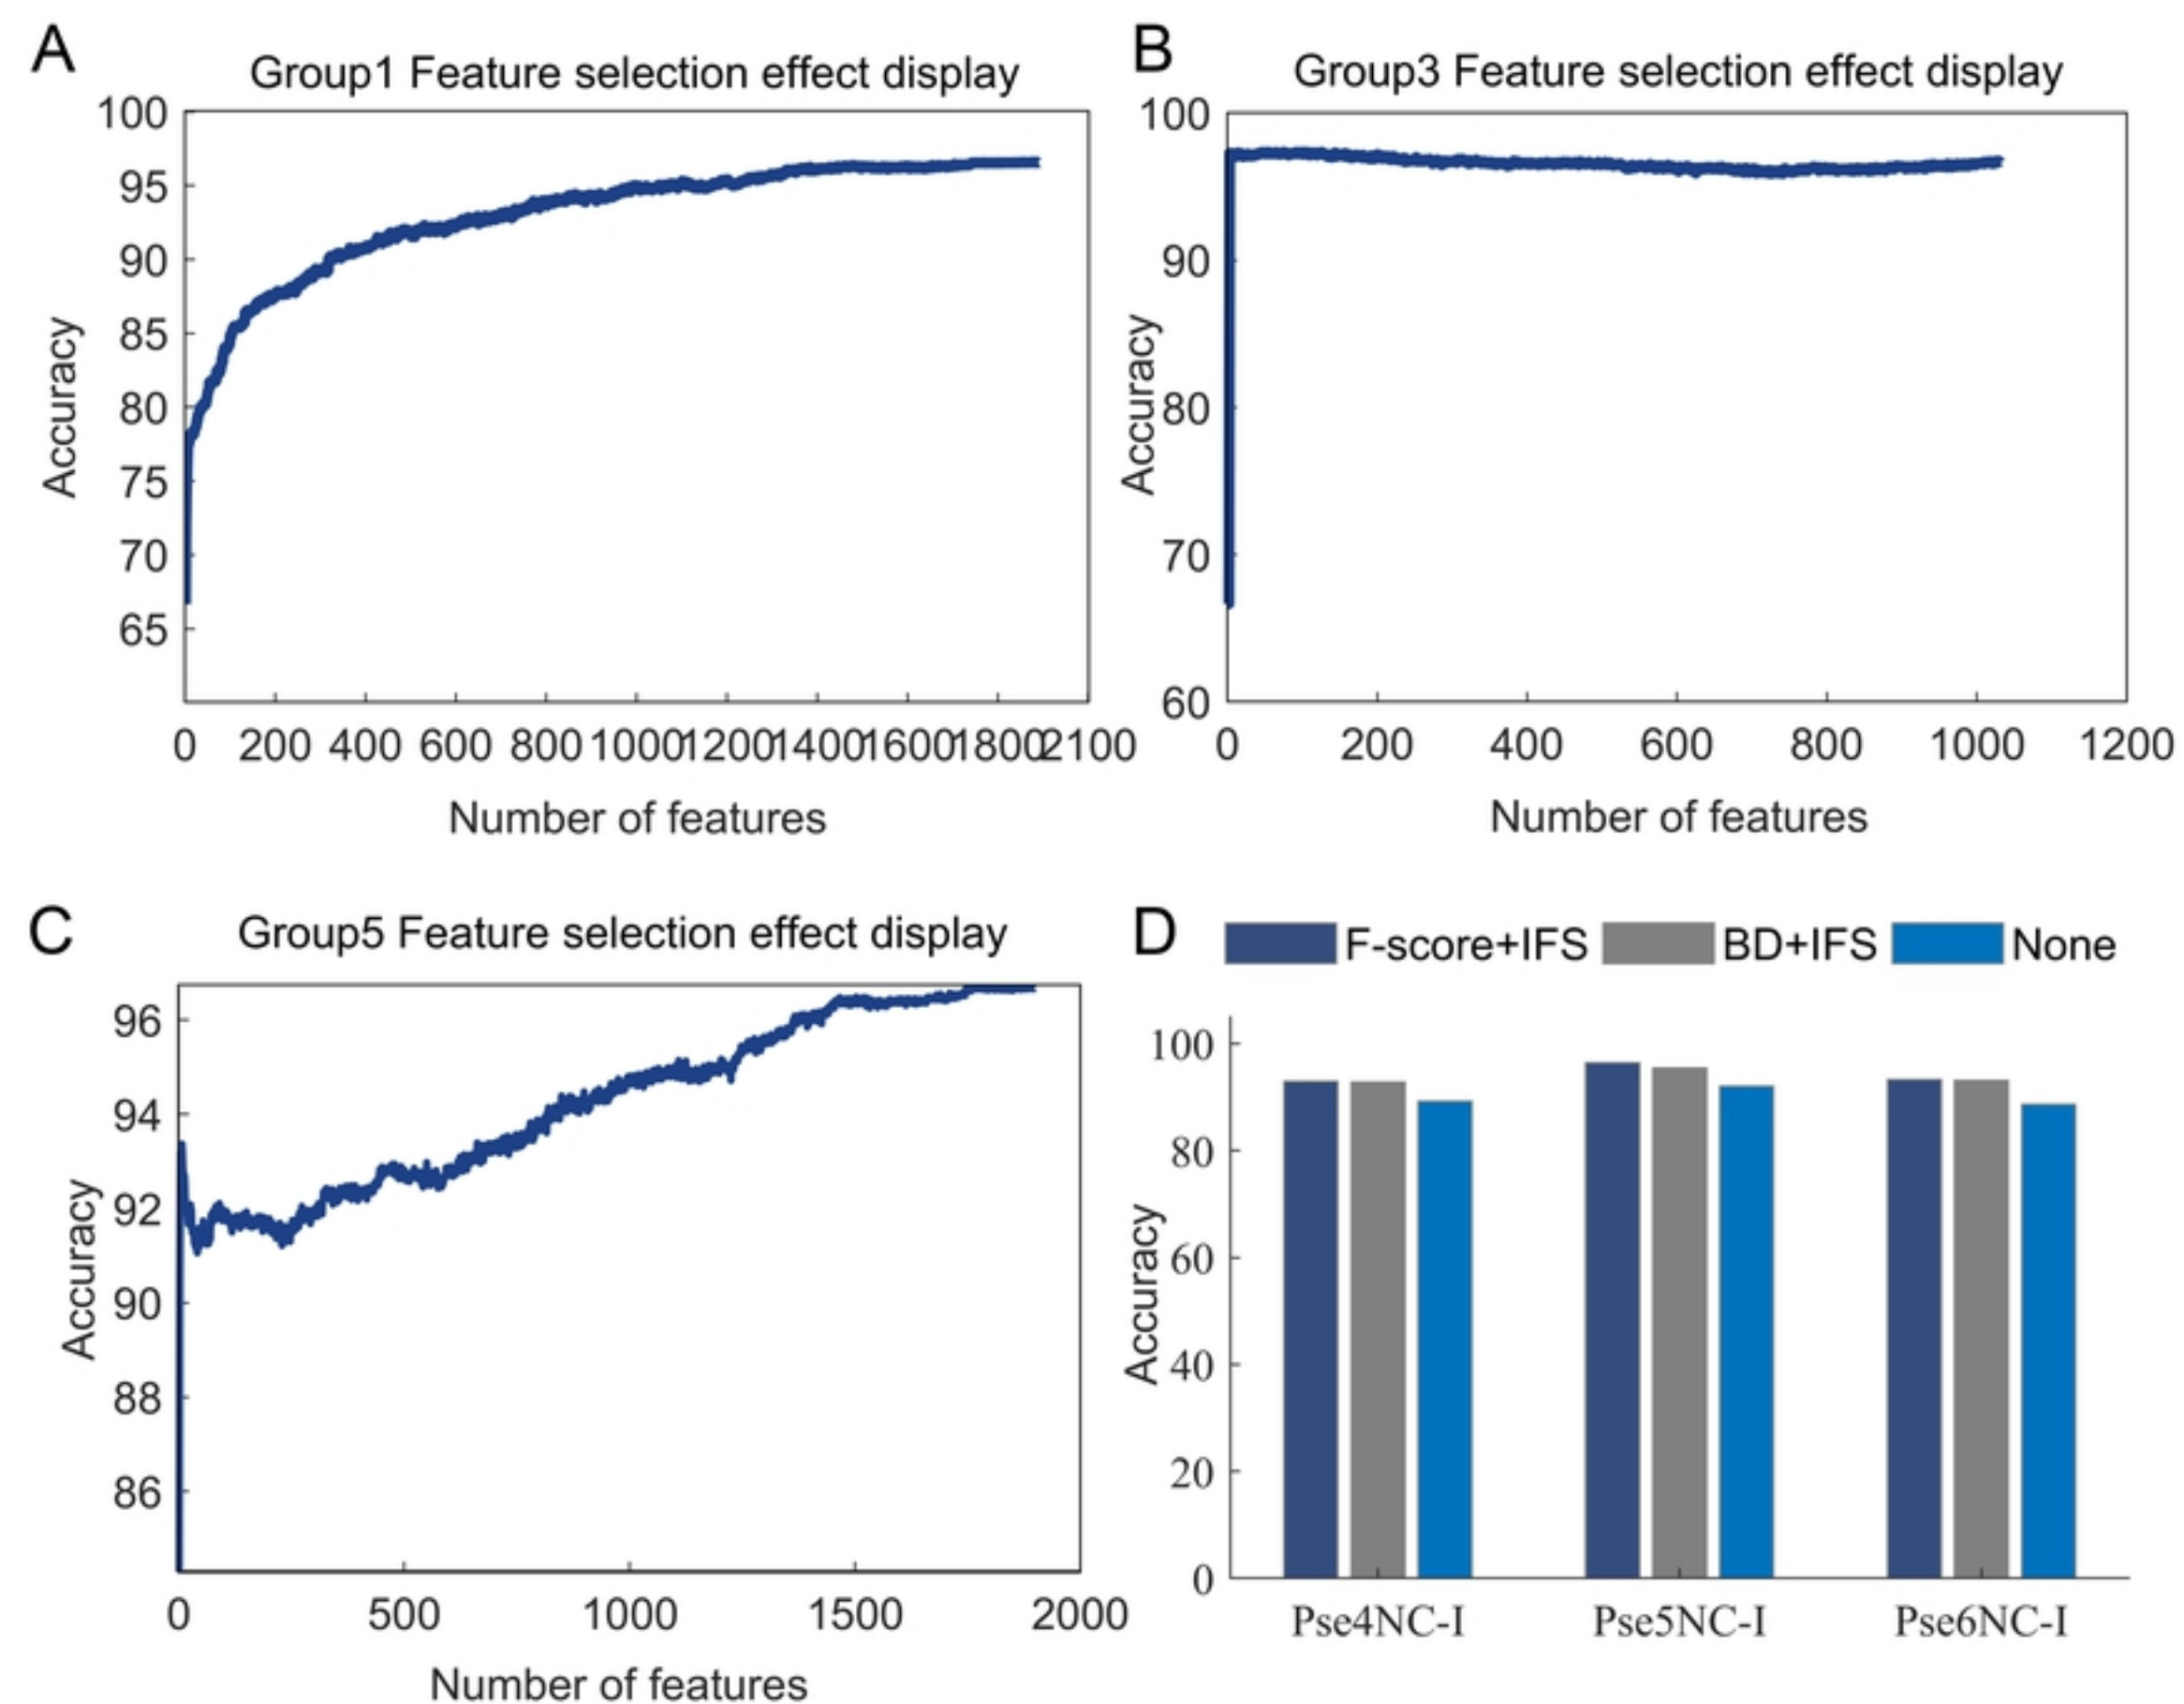

Figure

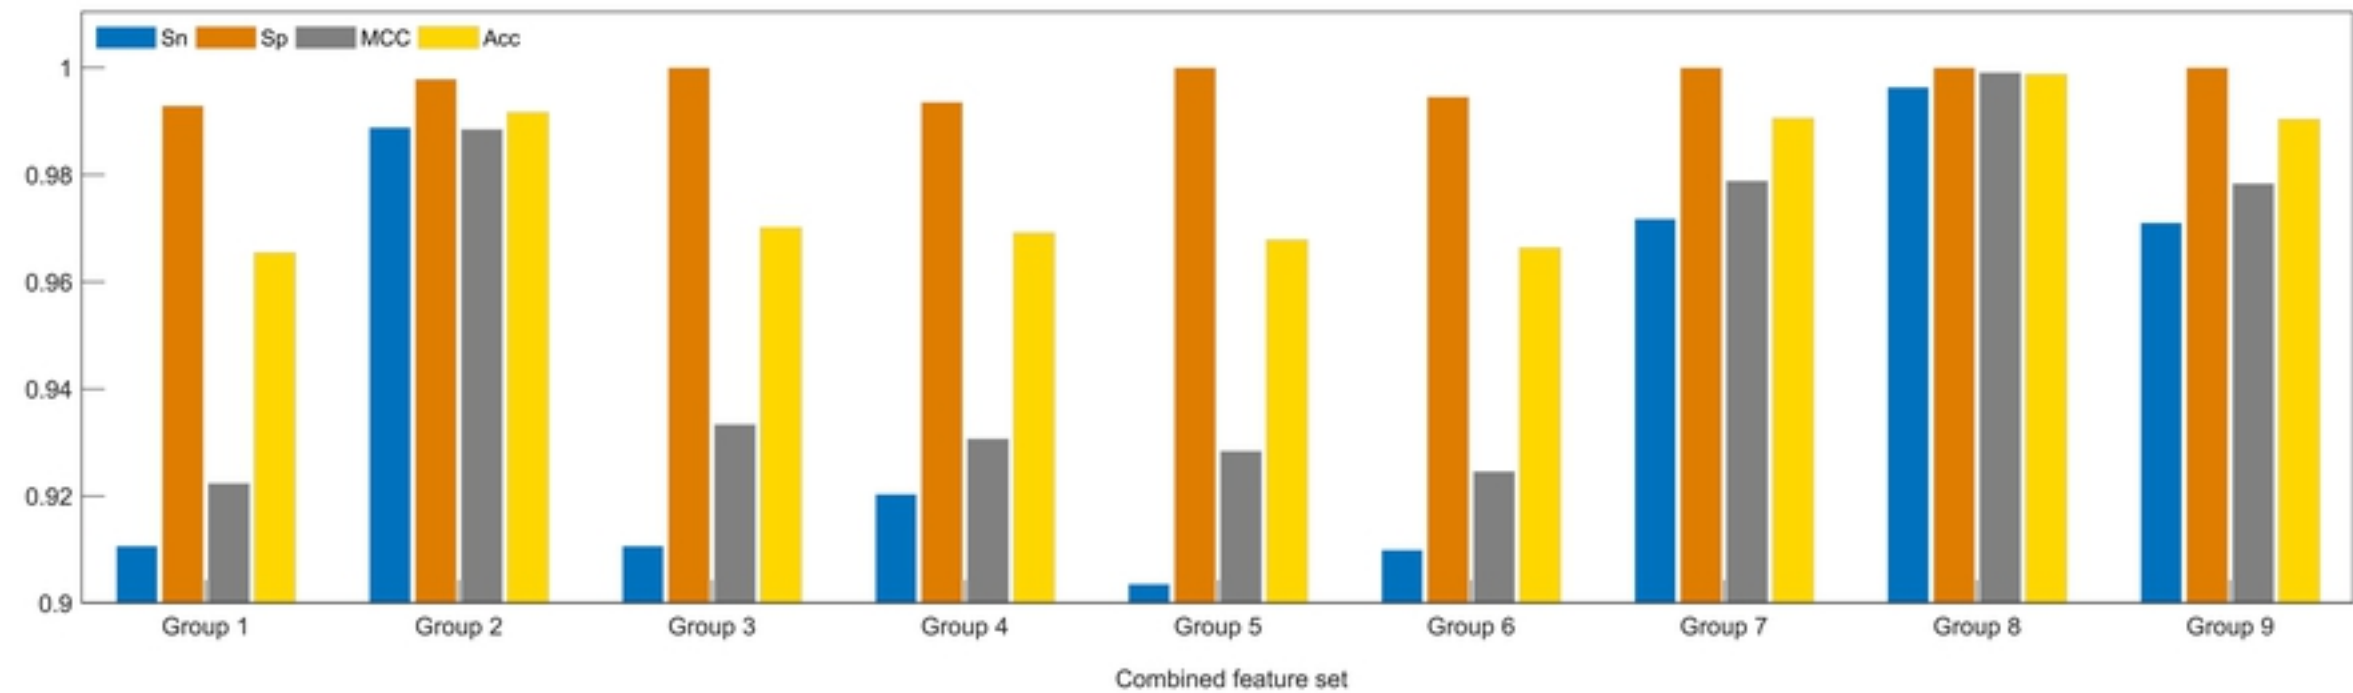

Figure

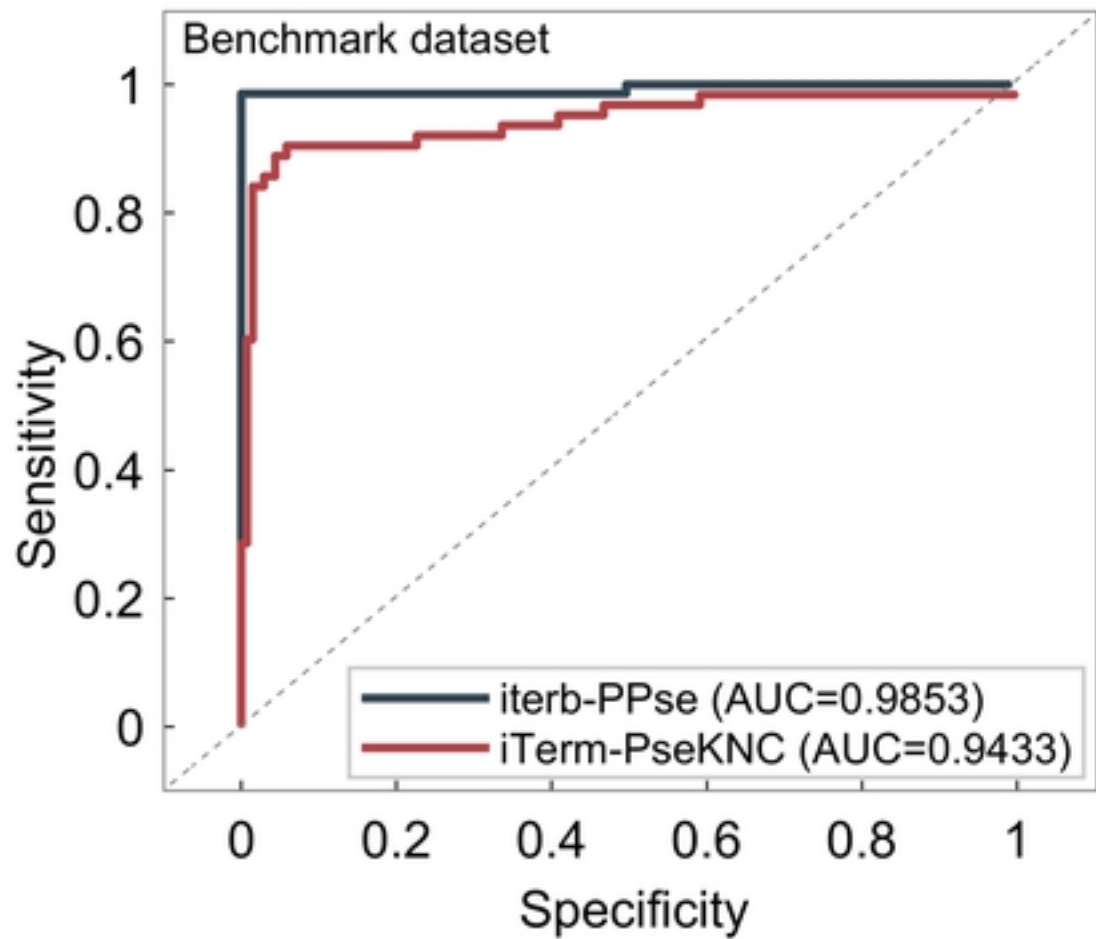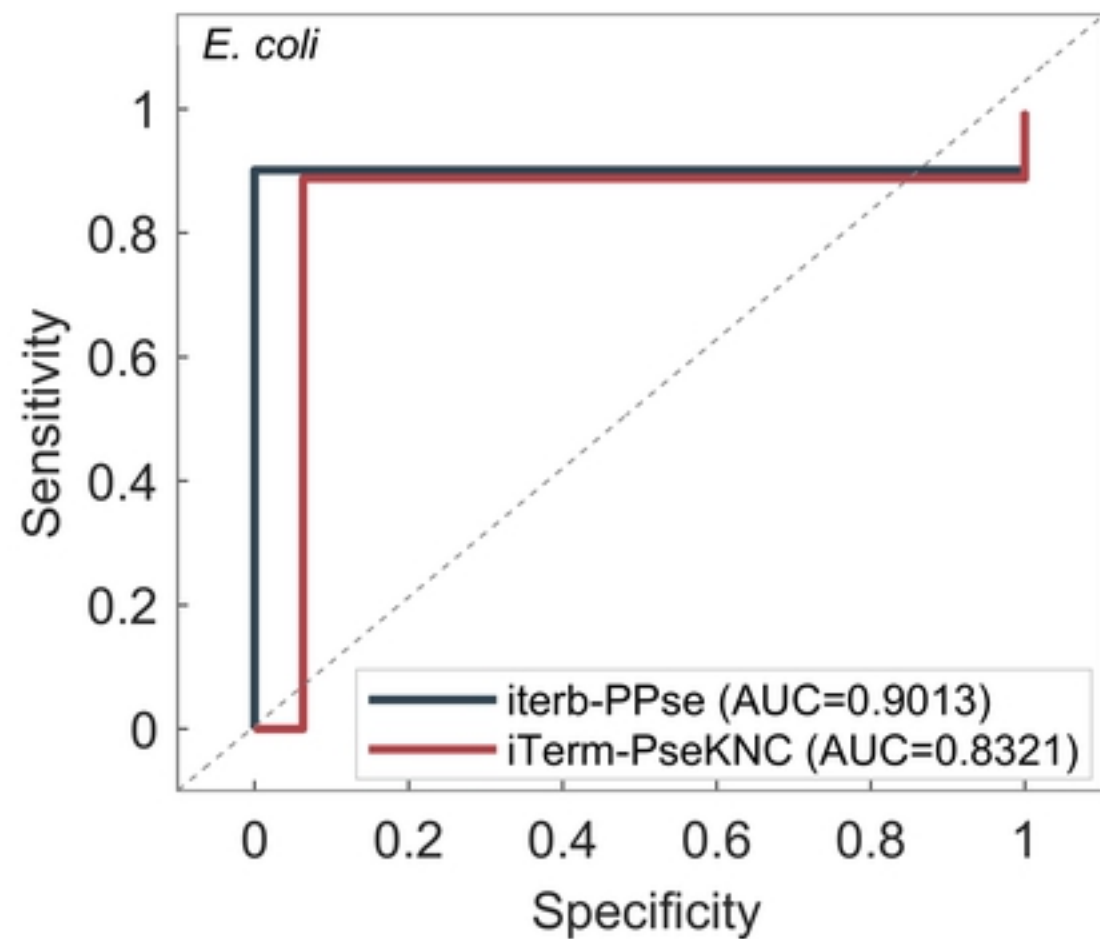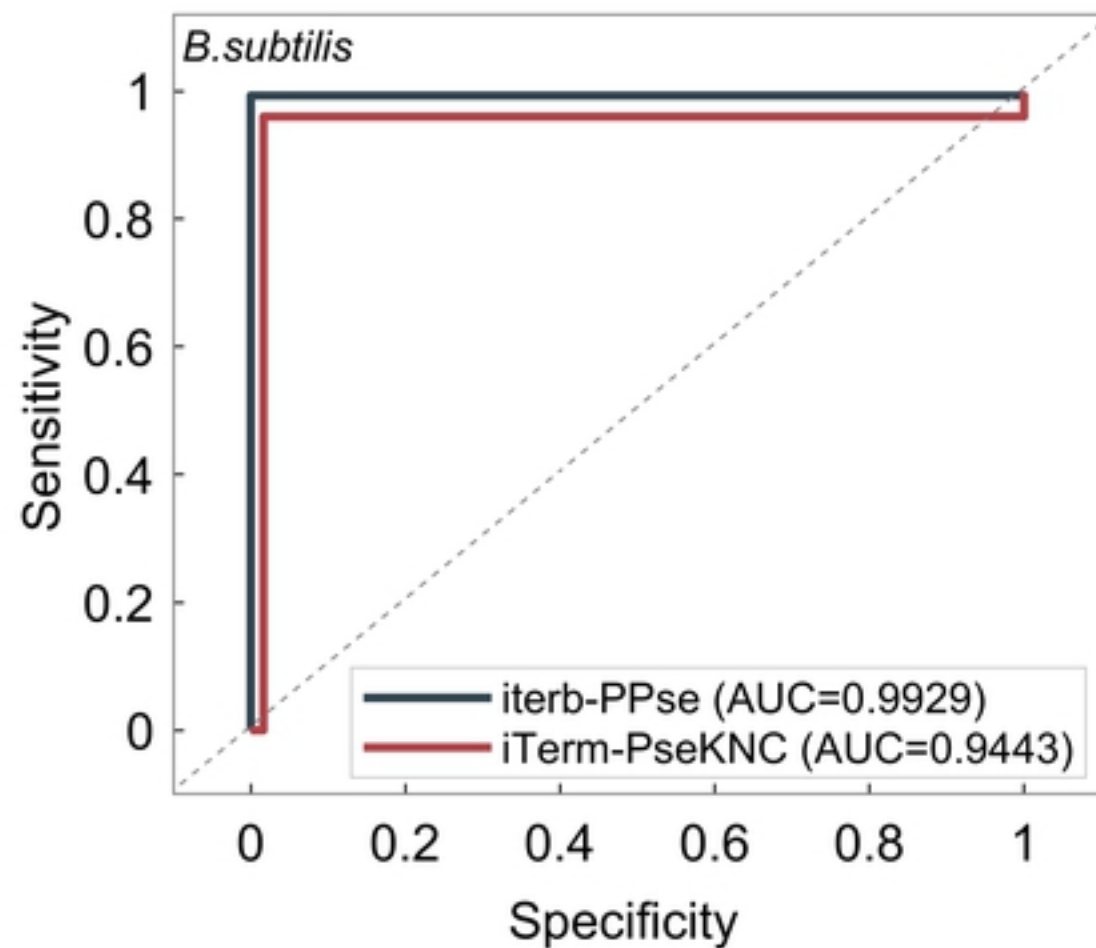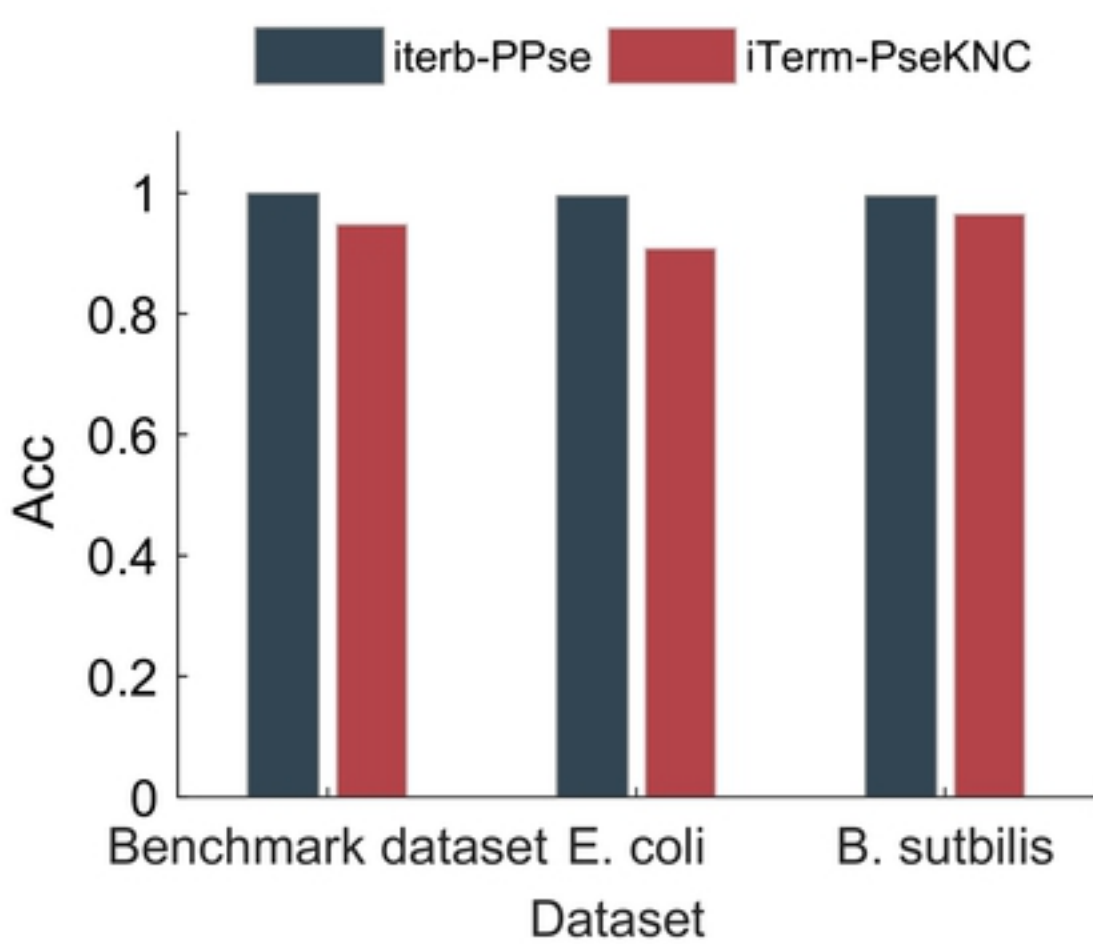

Figure



## iterb-PPse: Identification of transcriptional terminators in bacterial

Please enter the data in the following format:

```
>1  
ACTGCTGAATGTGTACGTCAGT  
>2  
CGTGATCGCTAGCTAG
```

Clear

Submit

A

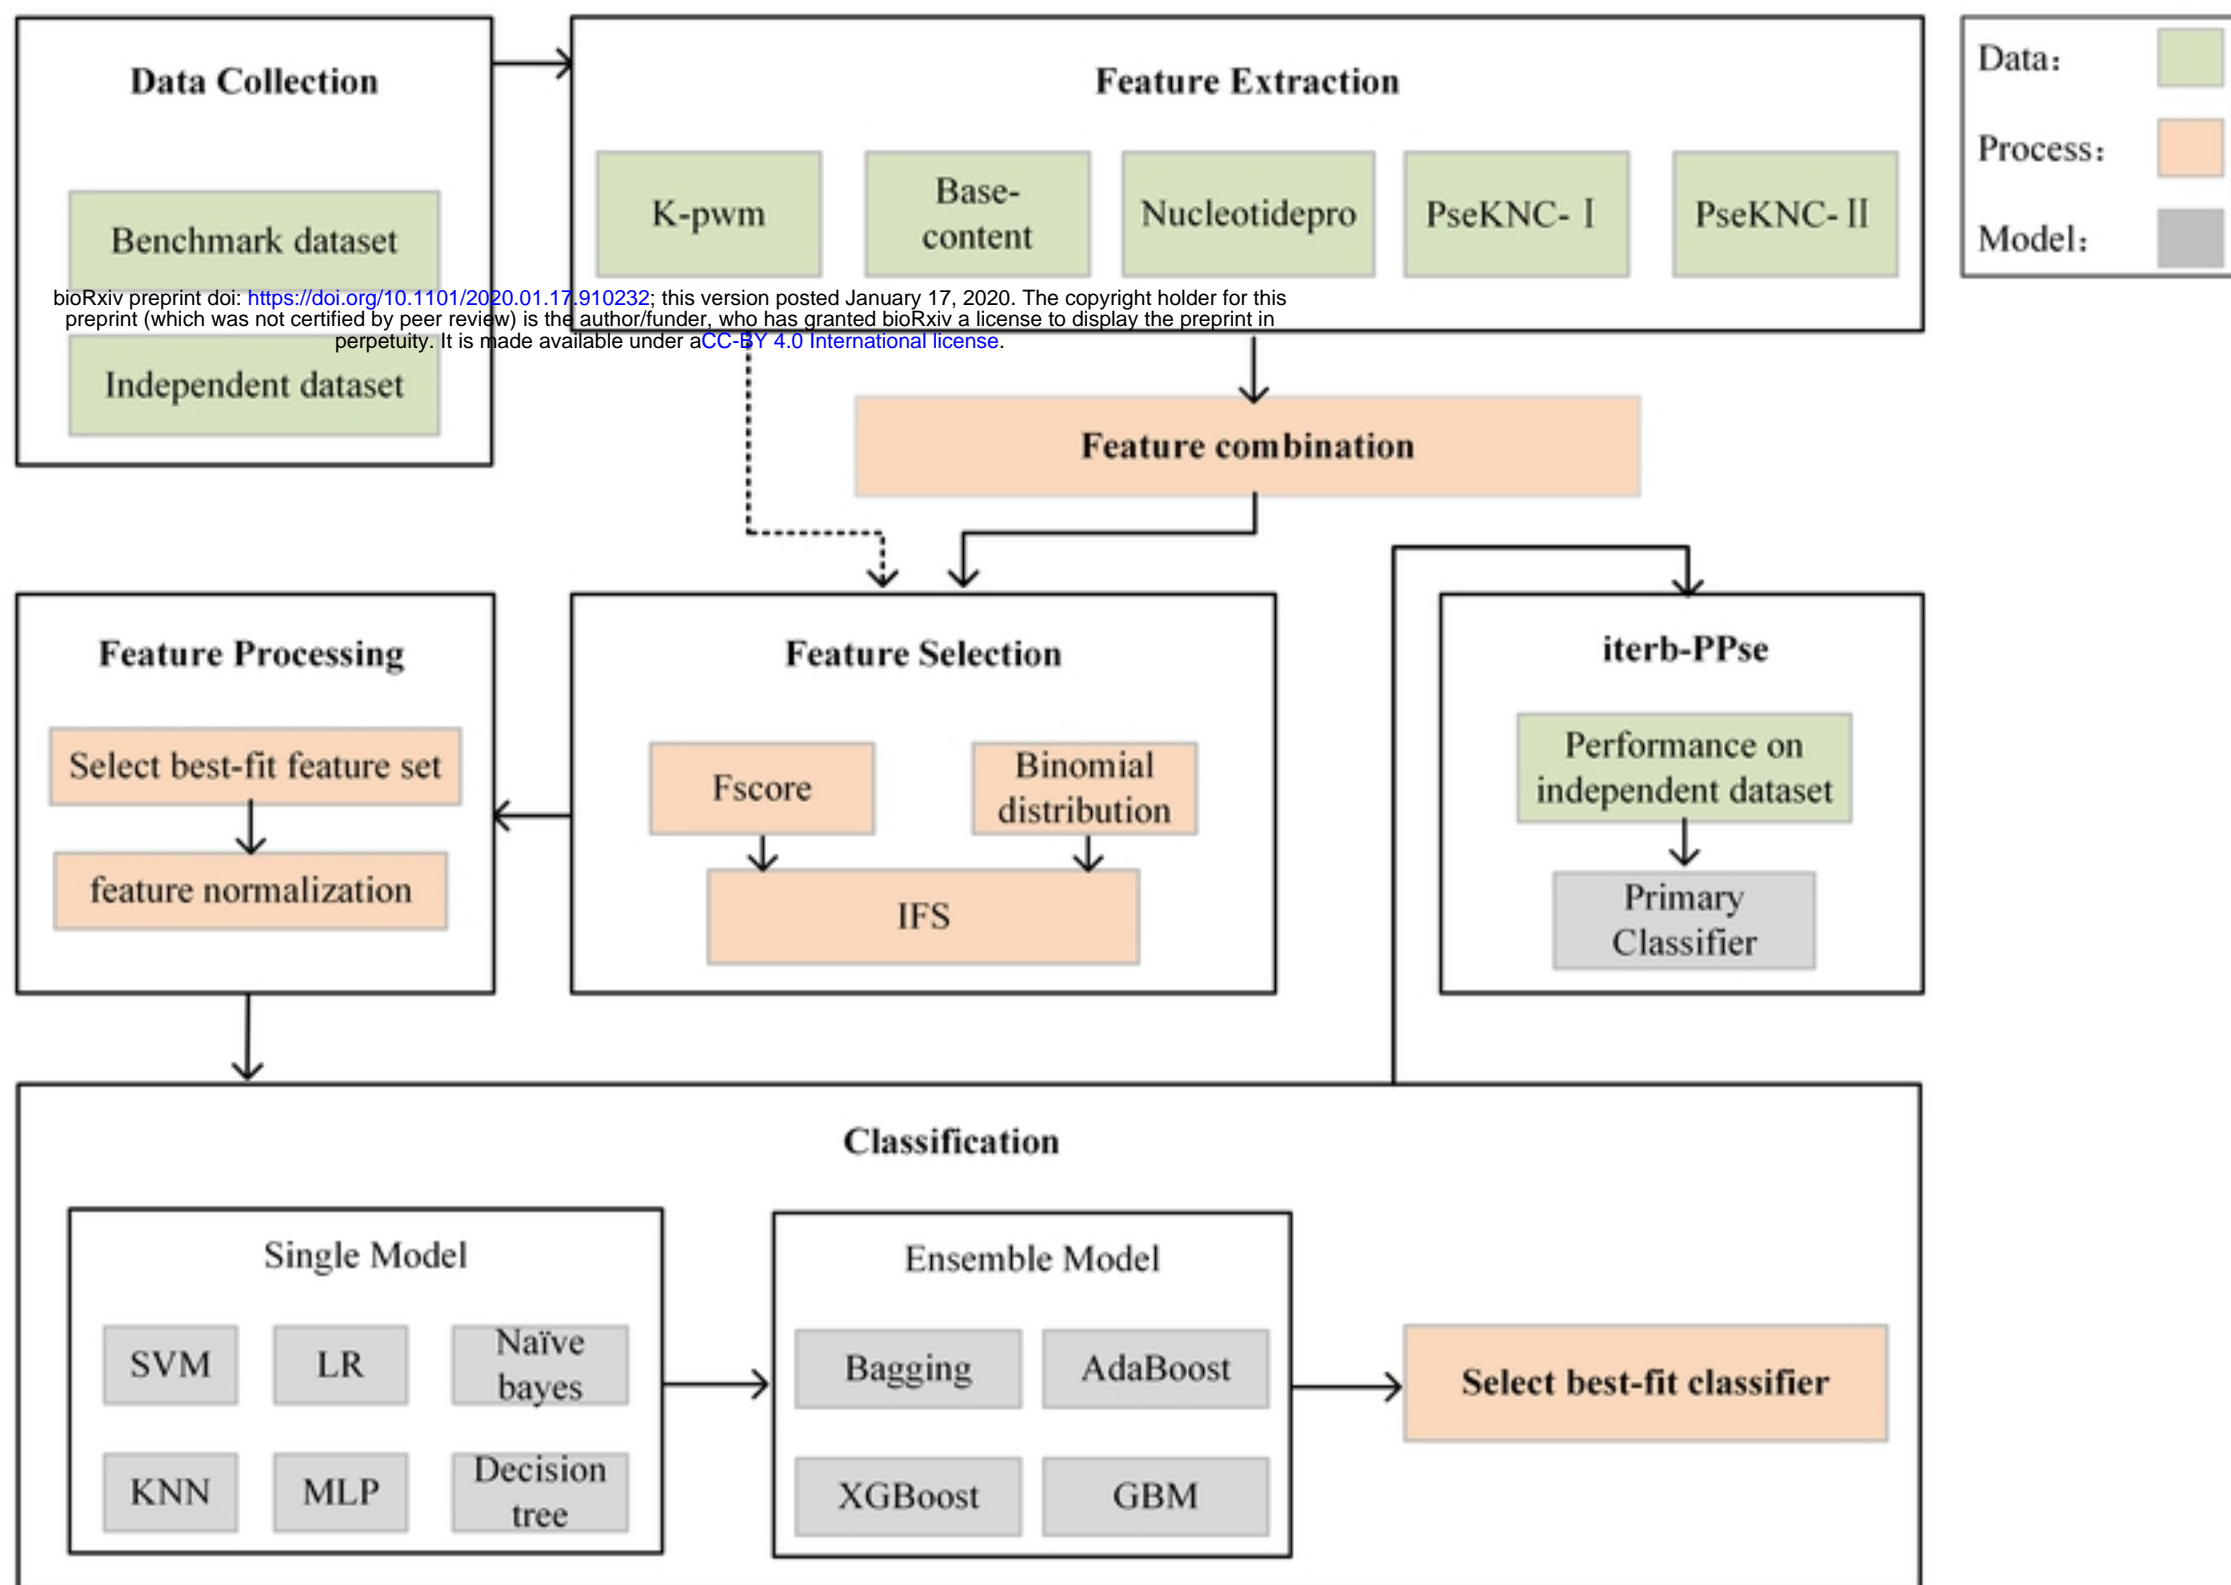

B

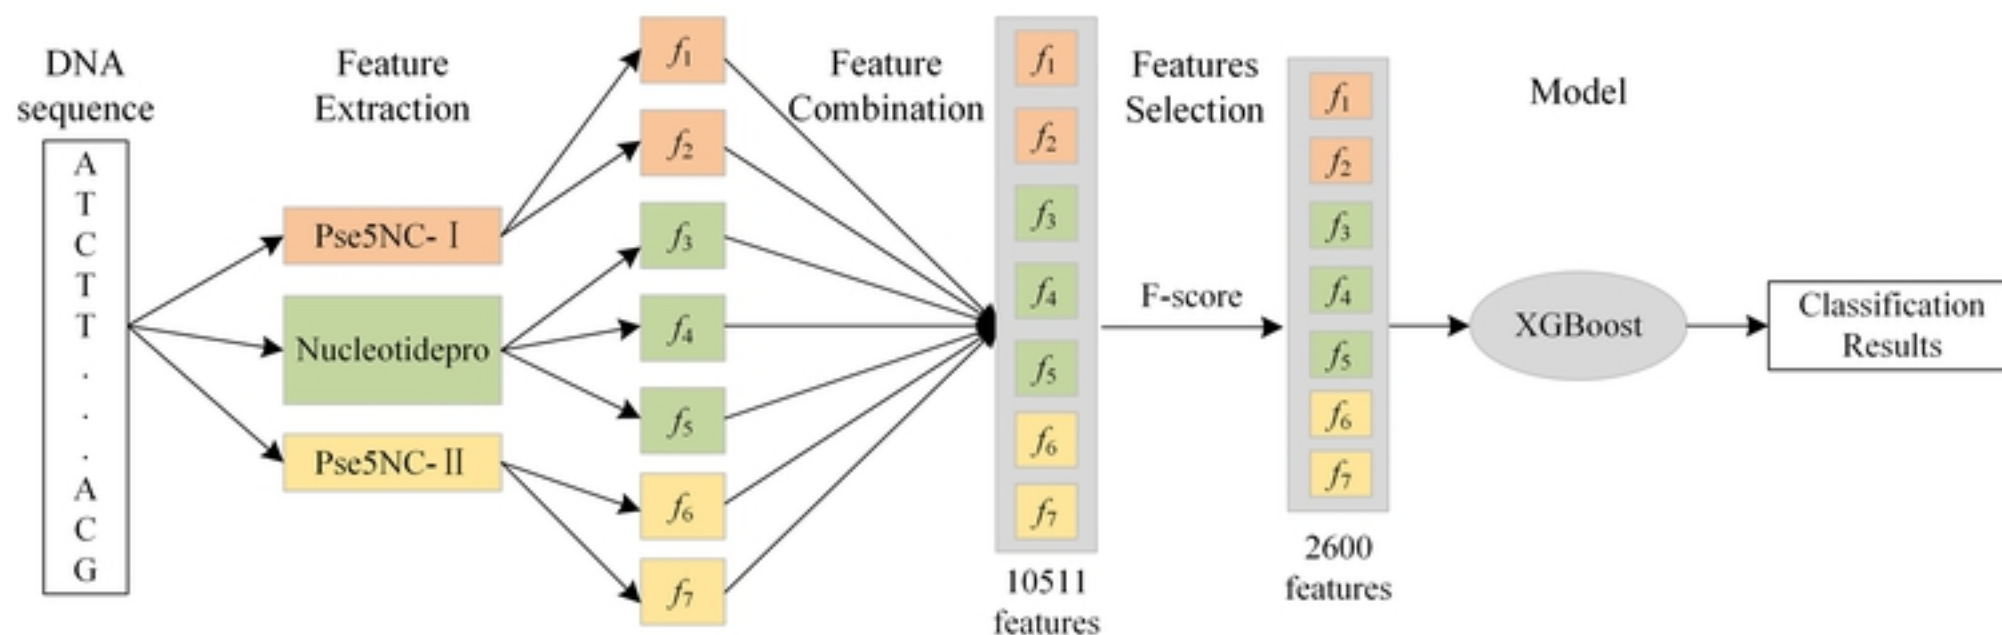

Figure

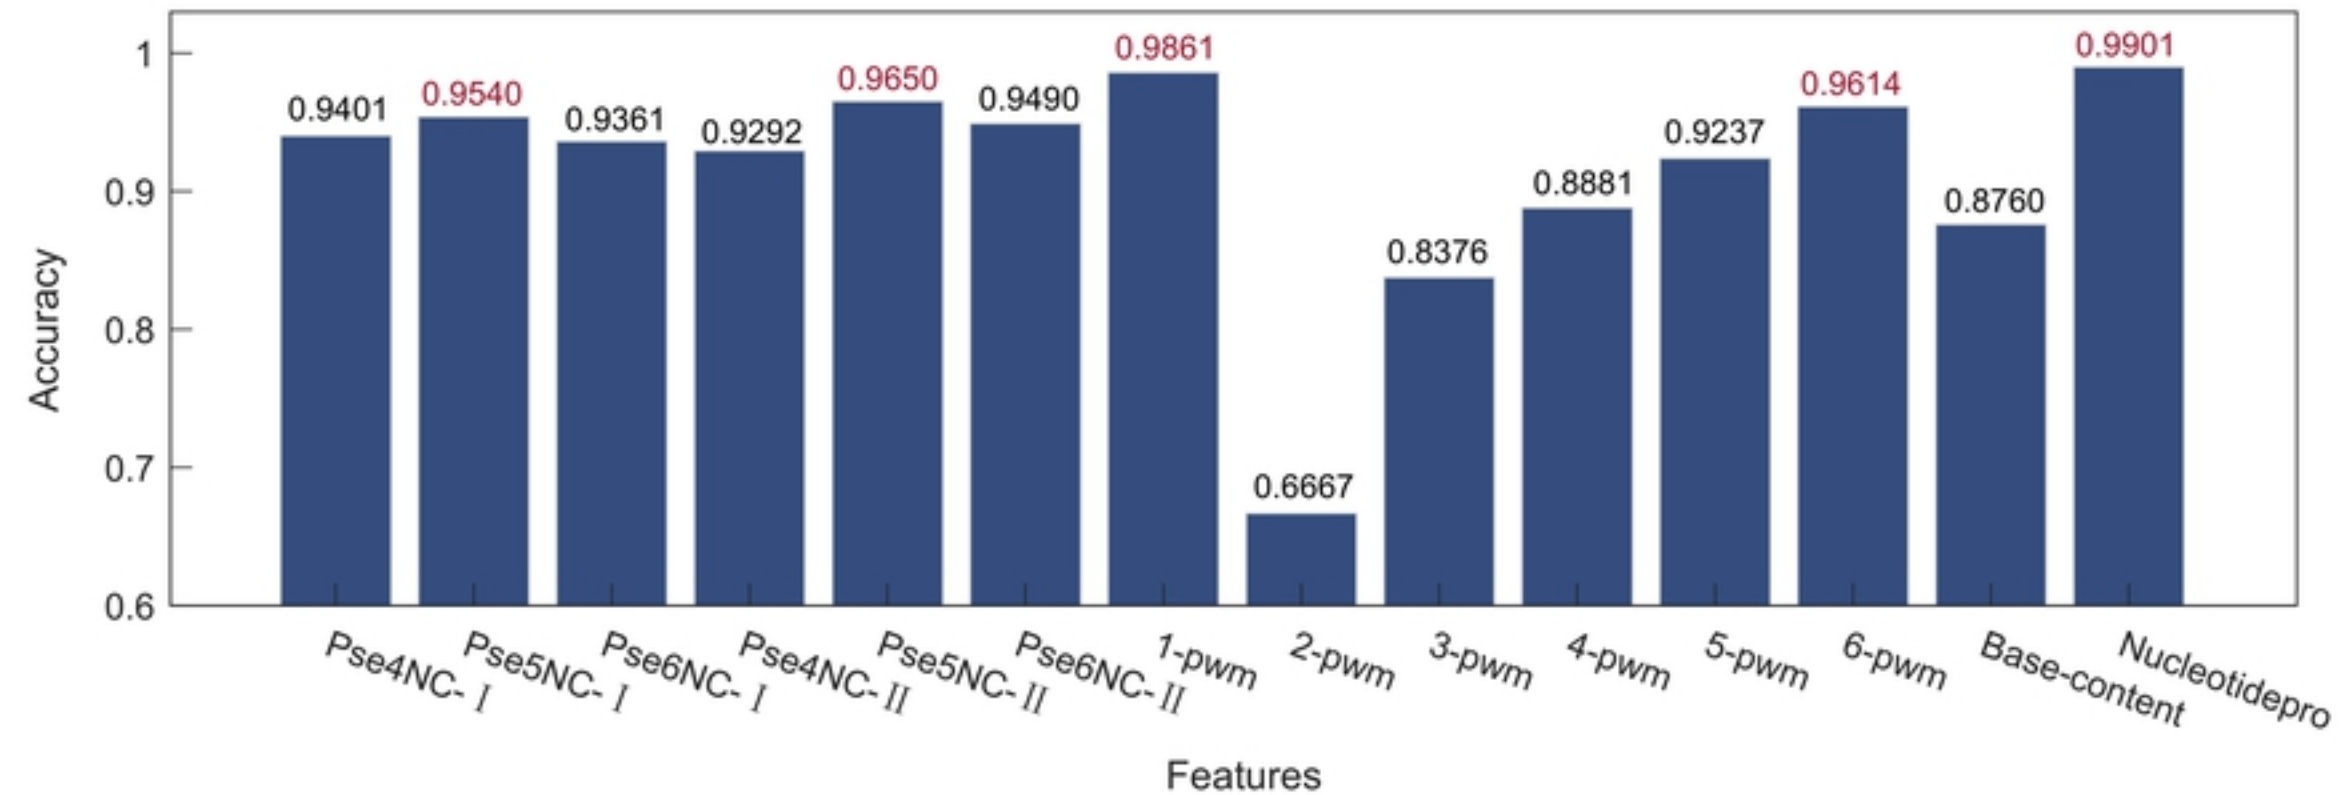

Figure
